# 1 Virtual epilepsy patient cohort: 2 generation and evaluation

3 **Borana Dollomaja<sup>1\*</sup>, Huifang E. Wang<sup>1\*</sup>, Maxime Guye<sup>3,4</sup>, Julia Makhalova<sup>2,3,4</sup>, Fabrice**  
4 **Bartolomei<sup>1,2</sup>, Viktor K. Jirsa<sup>1</sup>**

5 <sup>1</sup>Aix-Marseille Université, INSERM, Institut de Neurosciences des Systèmes (INS) UMR1106,  
6 Marseille 13005, France; <sup>2</sup>APHM, Epileptology and Clinical Neurophysiology Department, Timone  
7 Hospital, Marseille 13005, France.; <sup>3</sup>Aix-Marseille Université, CNRS, CRMBM, Marseille 13005,  
8 France.; <sup>4</sup>APHM, Timone University Hospital, CEMEREM, Marseille 13005, France.; \*For  
9 correspondence: [borana.dollomaja@univ-amu.fr](mailto:borana.dollomaja@univ-amu.fr); [huyfang.wang@univ-amu.fr](mailto:huyfang.wang@univ-amu.fr)

10 **Abstract** Epilepsy is a prevalent brain disorder, characterized by sudden, abnormal brain activity, making it  
11 difficult to live with. One-third of people with epilepsy do not respond to anti-epileptic drugs. Drug-resistant  
12 epilepsy is treated with brain surgery. Successful surgical treatment relies on identifying brain regions  
13 responsible for seizure onset, known as epileptogenic zones (EZ). Despite various methods for EZ estimation,  
14 evaluating their efficacy remains challenging due to a lack of ground truth for empirical data. To address this,  
15 we generated and evaluated a cohort of 30 virtual epilepsy patients, using patient-specific anatomical and  
16 functional data from 30 real drug-resistant epilepsy patients. This personalized modelling, based on the  
17 patient's brain data, is called a virtual brain twin. For each virtual patient, we provided data that included  
18 anatomically parcellated brain regions, structural connectivity, reconstructed intracranial electrodes,  
19 simulated brain activity at both the brain region and electrode levels, and key parameters of the virtual brain  
20 twin. These key parameters, which include the EZ hypothesis, serve as the ground-truth for simulated brain  
21 activity. For each virtual brain twin, we generated synthetic spontaneous seizures, stimulation-induced  
22 seizures and interictal activity. We systematically evaluated these simulated brain signals by quantitatively  
23 comparing them against their corresponding empirical intracranial recordings. Simulated signals based on  
24 patient-specific EZ captured spatio-temporal seizure generation and propagation. Through in-silico  
25 exploration of stimulation parameters, we also demonstrated the role of patient-specific stimulation location  
26 and amplitude in reproducing empirically stimulated seizures. The virtual epileptic cohort is openly available,  
27 and can be directly used to systematically evaluate methods for the estimation of EZ or source localization  
28 using ground truth EZ parameters and source signals.

29 *Keywords:* epilepsy, virtual patient, brain stimulation, epileptogenic zone, synthetic data, diagnosis

## 30 1 Introduction

31 Epilepsy is one of the most common neurological disorders, affecting 1% of the global population. It is charac-  
32 terized by recurrent spontaneous seizures, which are sudden bursts of abnormal electrical activity of the brain.  
33 Anti-epileptic drugs are the most common treatment option, however one-third of patients with epilepsy are  
34 drug-resistant. In such cases, brain surgery is the main alternative treatment, which seeks to resect brain zones  
35 responsible for seizures, known as epileptogenic zones (EZ) (*Ryvlin et al., 2014; Thijs et al., 2019*).

36 For precise localization of the EZ pre-surgery, intracranial depth electrodes (stereo-electroencephalography,  
37 SEEG), are inserted in the patient's brain to locally record electrical brain activity (*Isnard et al., 2018*). Sponta-  
38 neous seizures recorded with intracranial electrodes are used to define the EZ. However, due to partial sam-  
39 pling from the intracranial electrodes, spontaneous seizures may not be sufficient to make a clear diagnosis.  
40 Intracranial electrical stimulation is performed to contribute to the EZ localization by triggering seizures and  
41 for functionality mapping of regions explored (*Trebuchon et al., 2020*). Outside of seizure events and when  
42 a patient is at rest, interictal activity is recorded, where interictal spikes are analyzed to contribute to the EZ  
43 localisation. Both ictal and interictal activities are used to constrain and define the epileptogenic zone.

44 Despite great research and clinical efforts to tackle drug-resistant epilepsy, brain surgery has a failure rate  
45 of about 50% (*Ryvlin et al., 2014*). Treatment failure is attributed to a misdiagnosis or a partial diagnosis of the  
46 EZ. Therefore, a precise EZ diagnosis is crucial to improve treatment of drug-resistant epilepsy. Many methods  
47 have been proposed to diagnose the EZ based on analysis of empirical brain recordings (*Gnatkovsky et al., 2014;*  
48 *Bartolomei et al., 2008*). However, they are difficult to evaluate due to absence of ground truth information for  
49 empirical data. Recent studies evoke the need for synthetic datasets in order to benchmark scientific methods  
50 (*Gonzales et al., 2023; Giuffrè and Shung, 2023*). When synthetic datasets capture the structure and features  
51 of empirical data, they can be useful for hypothesis testing and validation prior to accessing the real dataset  
52 (*Gonzales et al., 2023*). Furthermore, synthetic health care datasets protect patient privacy and are easier to  
53 access compared to empirical data for which strict privacy laws are in place (*GDPR, 2016; HIPAA, 1996*).

54 We sought to build a reliable synthetic dataset of patients with drug-resistant epilepsy, based on parame-  
55 terized epileptogenic zone information, inferred from empirical spontaneous seizures. This resource could be  
56 used by the scientific community to test and validate their EZ diagnosis methods. To achieve this, we built for  
57 each patient a virtual brain twin, using their T1-weighted magnetic resonance imaging (T1-MRI) and diffusion-  
58 weighted MRI (DW-MRI) to estimate region-to-region connectivity and build a whole-brain network model. SEEG  
59 electrode locations are reconstructed from post-operative CT. To model brain activity, the Epileptor model is  
60 employed, which describes spatio-temporal seizure dynamics (*Jirsa et al., 2014*). Finally, to determine the EZ  
61 parameters for each patient, we used the Virtual Epileptic Patient (VEP) pipeline (*Wang et al., 2023*). The VEP  
62 estimates the epileptogenic zone from empirical seizure recordings, using personalized whole-brain modelling  
63 and machine learning methods (*Hashemi et al., 2020*). This pipeline is currently used in a clinical trial, with the  
64 goal of improving surgical outcome for DRE (EPINOV NCT03643016) (*Makhalova et al., 2022; Wang et al., 2023*).  
65 In addition, we used the clinical EZ estimation from expert epileptologists as a second approach.

66 As a result, we generated a virtual cohort of 30 drug-resistant epilepsy patients. We introduced metrics to  
67 systematically compare this virtual cohort against the corresponding empirical cohort. We provided for the  
68 first time, an extended model for stimulated seizures on the whole-brain level. For each patient, we used one  
69 virtual brain model to generate synthetic spontaneous seizures, stimulated seizures and interictal activity. We  
70 also provided the personalized brain network models and parameters used to simulate the data. Addition-  
71 ally, we interrogated the influence of stimulation location and simulation amplitude on seizure networks. We  
72 shared this dataset publicly in iEEG-BIDS format (*Holdgraf et al., 2019*) to help the scientific community when  
73 systematically evaluating and validating their EZ estimation methods. The unique feature of the virtual cohort  
74 lies in its known ground-truth from the modeling setting and detailed parameters.

75 Despite being an emerging technology, synthetic datasets can enhance clinical research, protect patient  
76 privacy, and reduce costs (*Giuffrè and Shung, 2023*). Synthetic SEEG data have been used to validate dynamical  
77 network biomarkers (*Runfola et al., 2023*) and validate methods for estimating epileptogenic zones (*Hashemi*  
78 *et al., 2020; Wang et al., 2023*). The novelty of our work is the generation of a comprehensive virtual patient  
79 cohort, enabling researchers to evaluate their methods using synthetic data that mimic empirical data. Each

80 virtual brain twin contains synthetic spontaneous seizures, stimulated seizures and interictal activity at the  
81 whole-brain level and at the SEEG level. Here, we present for the first time synthetic seizures triggered by  
82 SEEG stimulation. Each patient's estimated EZ serves as model parameters, providing ground-truth data for  
83 the virtual cohort. This makes our synthetic cohort a valuable tool for assessing data analysis methods. We  
84 have made this dataset publicly available to help the scientific community test and refine their techniques.

85 The paper begins by outlining the workflow for building personalized brain models for drug-resistant epilepsy.  
86 It then provides an overview of the cohort, examples of simulated time series, and a systematic comparison  
87 between simulated and empirical SEEG data. We also assess the significance of model parameters, focusing  
88 on the EZ hypothesis and stimulation parameters. Finally, the discussion explores limitations and future appli-  
89 cations for synthetic data in epilepsy.

## 90 **2 Results**

### 91 **2.1 Workflow of the virtual epileptic cohort**

92 The workflow of the virtual epileptic cohort in *Figure 1* illustrates the process of generating patient-specific  
93 synthetic data using a personalized whole-brain network model derived from patient-specific brain imaging  
94 data, and conducting a systematic comparison.

95 First, we used patient-specific T1-MRI alongside the VEP atlas (*Wang et al., 2021*) to parcellate the brain into  
96 anatomo-functional relevant regions, represented as point-like sources. The DW-MRI was used to derive the  
97 region-to-region connectivity, by counting white matter streamlines to and from each brain region. Secondly,  
98 regional brain activity was simulated using the Epileptor model (*Jirsa et al., 2014*). Based on the EZ hypothesis,  
99 we parametrized the model's excitability for each region. We employed two EZ hypotheses: the VEP hypothesis  
100 and a clinically defined hypothesis. The VEP hypothesis is estimated from spontaneous seizures using Bayesian  
101 inference methods (*Wang et al., 2023*). The VEP hypothesis was evaluated retrospectively, reproducing the  
102 clinically defined EZ network with a precision of 0.6 (*Wang et al., 2023*). Additionally, the VEP was compared  
103 to the resected brain regions of 25 patients who underwent surgery. The VEP hypothesis demonstrated lower  
104 false discovery rates in seizure-free patients (mean, 0.028) compared to those who were not seizure-free (mean,  
105 0.407) (*Wang et al., 2023*). The clinical hypothesis is defined by clinical experts (JM and FB). Finally, from post-  
106 implantation CT scan we estimated the coordinates of SEEG electrodes. The distance between brain sources  
107 and SEEG sensors and the size of source regions is used to evaluate the source-to-sensor gain matrix. The  
108 gain matrix maps simulated source-level activity to sensors, obtaining synthetic SEEG activity. For each patient,  
109 one personalized brain model was used to simulate three different states: spontaneous seizures, stimulated  
110 seizures and the interictal period with spikes (*Figure 1*).

### 111 **2.2 Overview of virtual epileptic cohort**

112 The virtual epileptic cohort consists of 30 virtualized drug-resistant epilepsy patients (*Table 1*) and follows stan-  
113 dardized BIDS-IEEG structure (*Holdgraf et al., 2019*). For a detailed overview of this structure, see supplemen-  
114 tary ???. Following this standard, the data was categorized into *simulated* data and *derived* data. The simulated  
115 data contain simulated brain activity at the SEEG electrode level, with three modalities: spontaneous seizures,  
116 stimulated seizures and interictal activity. See *Table 1* for a summary of the number of simulations for each  
117 modality per patient. The derived data are extracted from MRI and CT-scan brain imaging, capturing the brain  
118 anatomy of each patient. This includes: (i) spatial coordinates of brain regions, (ii) coordinates of implanted  
119 SEEG electrodes, (iii) region-to-region connectivity matrix, and (iv) source-to-sensor gain matrix. Finally, per-  
120 sonalized model parameters (including the EZ hypothesis) and simulations at the whole-brain level are made  
121 available. In this paper, we define *ground truth* as the chosen model parameters which gave rise to simulated  
122 brain activities at the SEEG level.

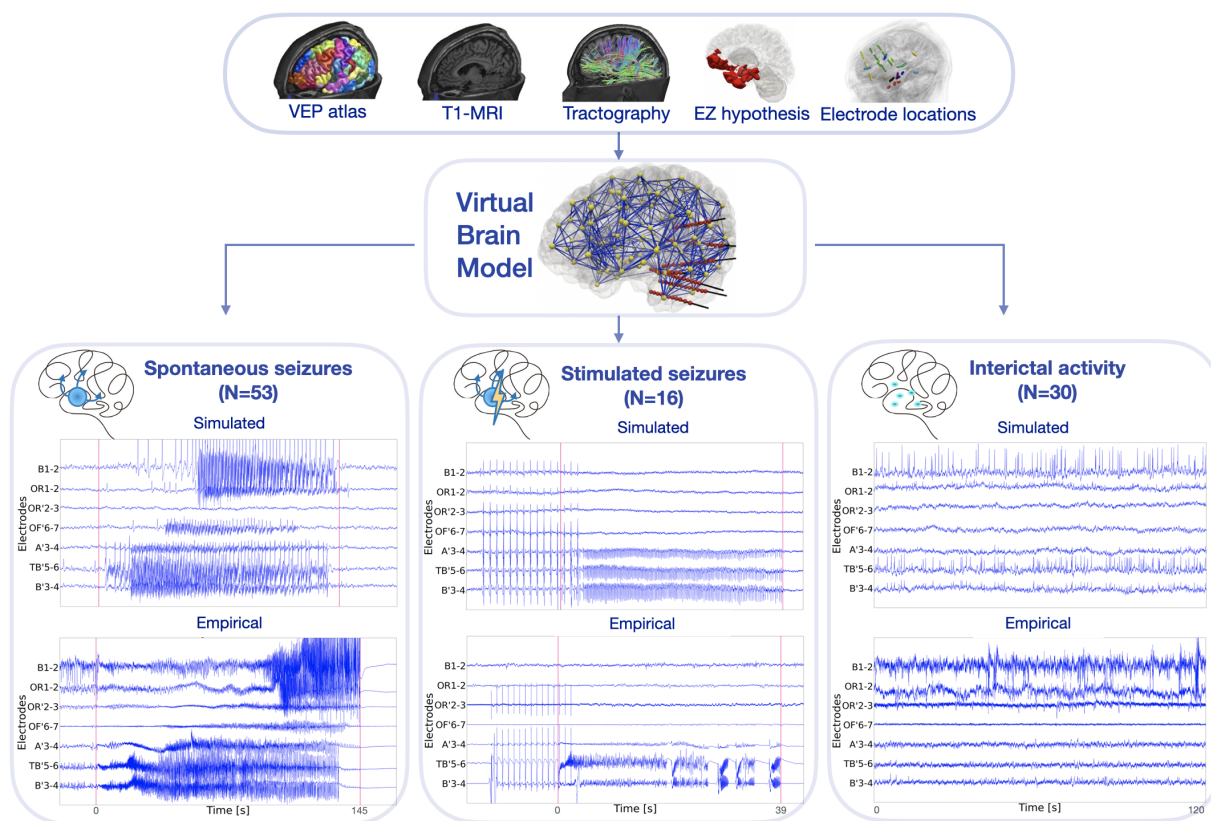

**Figure 1.** Workflow of the virtual epileptic cohort. Patient-specific T1-MRI, dw-MRI and CT-scan are integrated within a common virtual brain model. The VEP atlas is applied on the T1-MRI to parcellate the brain into anatomical regions, represented as network nodes. From the dw-MRI a tractography is computed, made of estimated white matter fiber connections, from which region-to-region connectivity is derived, represented as network edges. On each node of the virtual brain a neural mass model is used to simulate brain activity. The EZ hypothesis informs the excitability parameter for each brain region, can be derived from ictal SEEG data. Based on this brain model, three different states can be simulated: spontaneous seizures, stimulated seizures and interictal spikes. Whole-brain network activity is mapped onto the reconstructed SEEG electrodes using the source-to-sensor forward solution, thus obtaining simulated SEEG time series. The simulated SEEG time series are systematically compared against the empirical SEEG recordings using spatio-temporal data features.

**Table 1.** Patient information of the virtual epileptic cohort. Abbreviations: FCD, focal cortical dysplasia; HS, hippocampal sclerosis; L, left; NA, not applicable; PMG, polymicrogyria; PNH, periventricular nodular heterotopia; R, right; R>L: right hemisphere onset propagating to left hemisphere; R&L: right and left onset; NSS, number of simulated spontaneous seizures; NIS, number of simulated induced seizures; NII, number of simulated interictal timeseries.

| ID | Sex | Age range | Epilepsy type               | MRI                                                     | Histopathology | Side | NSS | NIS | NII |
|----|-----|-----------|-----------------------------|---------------------------------------------------------|----------------|------|-----|-----|-----|
| 1  | F   | 31-35     | Temporal                    | Normal                                                  | HS             | R    | 2   | 0   | 1   |
| 2  | F   | 26-30     | Temporo - occipital         | L temporo - occipital PNH                               | NA             | L    | 2   | 1   | 1   |
| 3  | M   | 36-40     | Temporo - frontal           | R temporo - occipital scar                              | FCD I          | R    | 1   | 1   | 1   |
| 4  | F   | 26-30     | Temporal                    | R temporal mesial ganglioglioma                         | Ganglioglioma  | R    | 2   | 0   | 1   |
| 5  | M   | 21-25     | Parietal                    | L postcentral - parietal gyration asymmetry             | NA             | L    | 2   | 0   | 1   |
| 6  | M   | 56-60     | Frontal                     | Normal                                                  | NA             | L    | 2   | 0   | 1   |
| 7  | M   | 56-60     | Temporal                    | Normal                                                  | mild gliosis   | R>L  | 1   | 1   | 1   |
| 8  | F   | 46-50     | Temporal                    | L amygdala enlargement                                  | mild gliosis   | L    | 3   | 1   | 1   |
| 9  | F   | 41-45     | Bifocal: parietal temporal  | R parietal lesion                                       | mild gliosis   | R    | 2   | 1   | 1   |
| 10 | F   | 41-45     | Temporal                    | L hippocampal sclerosis                                 | HS             | L    | 3   | 1   | 1   |
| 11 | F   | 41-45     | Frontal                     | L frontal scar(abcess)                                  | Gliosis        | L    | 1   | 1   | 1   |
| 12 | F   | 26-30     | Bilateral temporo - frontal | Bilateral hippocampal and amygdala T2-hypersignal       | NA             | R&L  | 2   | 2   | 1   |
| 13 | M   | 16-20     | Frontal                     | Normal                                                  | mild gliosis   | L    | 1   | 0   | 1   |
| 14 | F   | 21-25     | Premotor                    | Normal                                                  | FCD IIb        | L    | 1   | 0   | 1   |
| 15 | M   | 41-45     | Temporal                    | R temporal PMG and multiple PNH                         | NA             | R    | 2   | 1   | 1   |
| 16 | M   | 26-30     | Temporo - fronto - parietal | R temporo-parieto-insular & L temporo-parietal necrosis | NA             | R>L  | 3   | 0   | 1   |
| 17 | M   | 26-30     | Temporal                    | L temporo-polar hypothyrophy and HS                     | HS             | L    | 2   | 0   | 1   |
| 18 | M   | 21-25     | Parieto - temporal          | "L Parieto - occipital necrosis"                        | NA             | L    | 1   | 0   | 1   |
| 19 | M   | 41-45     | Temporo - insular           | Normal                                                  | NA             | L>R  | 1   | 0   | 1   |
| 20 | F   | 26-30     | Temporal                    | Normal                                                  | HS             | R    | 1   | 1   | 1   |
| 21 | F   | 21-25     | Occipital                   | Normal                                                  | FCD Ic         | L    | 2   | 0   | 1   |
| 22 | F   | 26-30     | Parietal                    | L parietal FCD                                          | FCD IIb        | L    | 1   | 1   | 1   |
| 23 | M   | 61-65     | Temporal                    | Normal                                                  | NA             | L    | 1   | 0   | 1   |
| 24 | M   | 26-30     | Temporal                    | Normal                                                  | NA             | R    | 3   | 0   | 1   |
| 25 | M   | 41-45     | Insular                     | Normal                                                  | NA             | L    | 3   | 2   | 1   |
| 26 | F   | 26-30     | Occipital                   | PNH                                                     | NA             | R    | 1   | 0   | 1   |
| 27 | M   | 26-30     | Frontal                     | R prefrontal gliotic scar (arteriovenous malformation)  | Gliosis        | R>L  | 1   | 1   | 1   |
| 28 | F   | 21-25     | Temporo - frontal           | Anterior temporal necrosis                              | Gliosis        | R    | 1   | 0   | 1   |
| 29 | F   | 26-30     | Bilateral temporal          | Bilateral posterior PNH                                 | NA             | R>L  | 3   | 1   | 1   |
| 30 | M   | 56-60     | Temporo - frontal           | R Frontal FCD                                           | FCD IIb        | R    | 2   | 0   | 1   |

## 123 2.3 Spontaneous seizures

### 124 2.3.1 Simulation of spontaneous seizures

125 We simulated spontaneous seizure data for each patient in this virtual epileptic cohort. We used the VEP hypothesis estimated from the VEP pipeline (*Wang et al., 2023*). This pipeline uses patient-specific data to build  
 126 virtual brain models and bayesian inference algorithms to obtain estimated distributions of excitability for each  
 127 brain region, in the [0, 1] range. We linearly transformed epileptogenicity values to the excitability parameter  $x_0$   
 128 into a range [-2.2, -1.2] in the Epileptor model (3). The critical value  $x_{0c}$  is approximately -2.0 depending on the  
 129 global connectivity matrix (*Wang et al., 2023*). For any given region, if  $x_0 > x_{0c}$  the region can autonomously gen-  
 130

131 erate seizures, otherwise it remains in the normal state. For each patient, we simulated one seizure for each  
132 empirical seizure type. We defined each seizure type qualitatively based on the seizure spatial propagation  
133 patterns observed at the SEEG level. While the seizure onset network was the same, the seizure propagation  
134 network varied across seizure types (see also supplementary ??). As a second approach, the clinical hypothesis  
135 was used to parameterize the epileptogenic network, with results presented in the supplementary ??. Epilep-  
136 togenic, propagation and healthy regions were coupled according to the structural connectome, which gave  
137 rise to whole-brain seizure dynamics. We simulated a total of 53 spontaneous seizures for each EZ hypothesis  
138 (1 – 3 per patient).

139 Examples of spontaneous seizures from two patients of the VEC are shown in *Figure 2*. Empirical and sim-  
140 ulated seizure activity are shown for patient 1 with temporal lobe epilepsy (*Figure 2A*). Empirical recordings  
141 indicated an early recruitment in the hippocampus of the right hemisphere. The estimated epileptogenic net-  
142 work using the VEP pipeline included the hippocampus-anterior, hippocampus-posterior and amygdala of the  
143 right hemisphere. The propagation network included the right-STS-anterior, the left-supramarginal-anterior,  
144 the left-temporal-pole, the left-rhinal-cortex and the left-Heschl-gyrus. From this estimation, we determined  
145 the excitability parameters for all brain nodes and simulated the SEEG time series. The SEEG signal power over  
146 the whole activity is visualized on the reconstructed electrodes. Secondly, the same data are shown for patient  
147 5 with parietal epilepsy in *Figure 2B*. Here, the estimated epileptogenic network included the postcentral-gyrus,  
148 superior-parietal-lobule, and angular-gyrus of the left hemisphere. The propagation network extended to both  
149 right and left hemisphere brain regions.

### 150 2.3.2 Evaluating spontaneous seizures

151 To evaluate the spatio-temporal information captured by the virtual epileptic cohort, we compared simulated  
152 and empirical SEEG time series for 53 spontaneous seizures (*Figure 3*). In addition, to evaluate the importance  
153 of personalized parameters in the subsequent simulated data, we built a randomized cohort (RC) of 15 simu-  
154 lated spontaneous seizures. This cohort was constructed using virtual brain models from the VEC cohort and  
155 changing only their EZ hypothesis by random selection from another patient.

156 We showed four metrics to compare empirical and simulated spatio-temporal seizure dynamics in *Figure 3*  
157 (all 16 metrics shown in ??). We captured high frequencies of the signal during seizure activity using a high-pass  
158 filter followed by envelope smoothing using a low-pass filter. When the envelope crossed a defined threshold,  
159 we marked the corresponding electrode as seizure electrode. By marking the timestamps when the envelope  
160 jumps from and returns to baseline, we estimated the seizure onset and offset times, respectively (see *Fig-*  
161 *ure 3A*). Next, each electrode's activity was binarized in time at each timestep (0-no seizure activity; 1- seizure  
162 activity) (see *Figure 3B*). The binarized synthetic and empirical SEEG were compared using Pearson correlation.  
163 We also compared the intersection of SEEG seizure channels between the empirical and synthetic time series,  
164 resulting in our overlap metric. Finally, based on seizure onset times, we categorized each channel as either  
165 seizure onset (SO), seizure propagation (SP) or no seizure. Each category was compared using the Jaccard sim-  
166 ilarity coefficient (see *Figure 3D*, see also *Methods and Materials*). We performed a permutation test for each  
167 metric ( $H_0$  : mean(VEC)  $\leq$  mean(RC),  $H_1$  : mean(VEC)  $>$  mean(RC)). The virtual epileptic cohort performs signif-  
168 icantly better than the randomized cohort ( $p < 0.0001$ ). In addition, results with EZ hypothesis based on the  
169 clinical hypothesis are presented in ??A.

## 170 2.4 Stimulated seizures

### 171 2.4.1 Simulation of stimulated seizures

172 We provided 16 SEEG stimulated seizures for 14 patients. We used the EZ hypothesis estimated from spon-  
173 taneous seizures and the same stimulation parameters which clinicians used in the clinical recordings. In *Fig-*  
174 *ure 4A*, we show an example of a focal temporal seizure from patient 3, triggered by stimulation of electrodes  
175 B2 and B3, as anode and cathode, respectively. The epileptogenic network is estimated from the spontaneous  
176 seizure of the same patient using the VEP pipeline. The epileptogenic zones are T2-anterior and hippocampus-  
177 anterior of the right hemispheres. The propagation zones are SFS-rostral, amygdala and fusiform gyrus of the

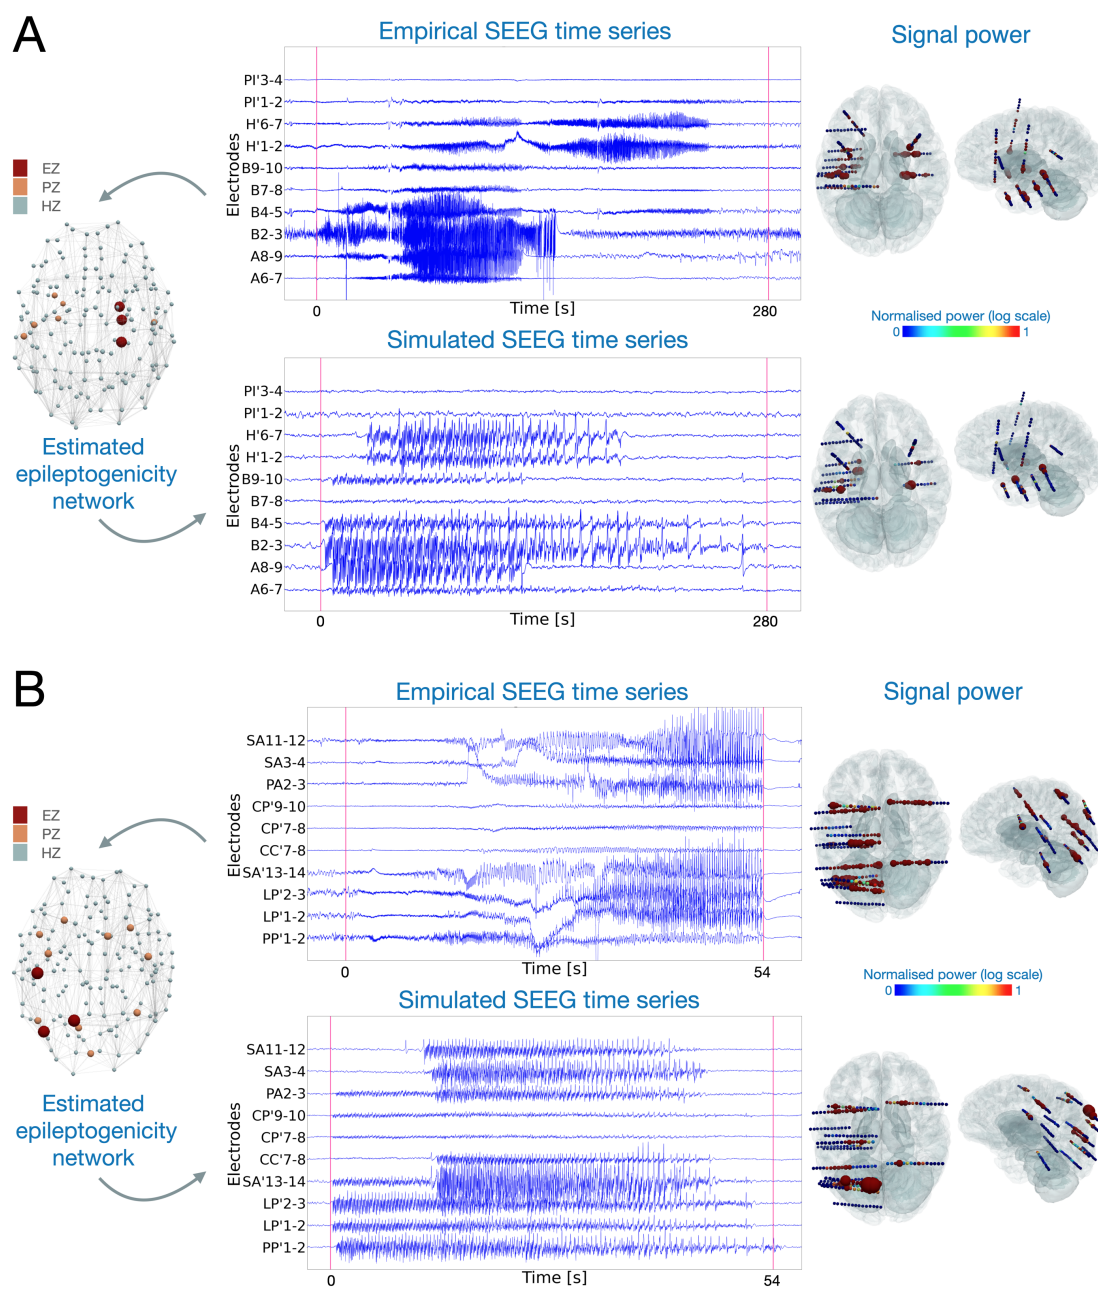

**Figure 2.** The corresponding empirical and simulated spontaneous seizure activity for: A) Patient 1 with temporal lobe epilepsy showing right-hemisphere hippocampal early involvement propagating after several seconds in the contra-lateral hemisphere, and B) Patient 5 with parietal epilepsy. In both A) and B), on the left-side panel, the estimated epileptogenic network from the empirical spontaneous seizure is plotted for each brain region. Red, orange and light blue represent EZ, PZ and HZ respectively. The top middle panels display empirical SEEG recordings. The bottom middle panels represent corresponding simulated recordings based on the EZ network. Red vertical lines denote the seizure onset and offset, determined by clinicians for the empirical recordings and by our model in the simulated time series. Right-side panels show the signal power distribution for all channels. The colorbar displays normalized signal power, where blue and red represent low and high signal power, respectively.

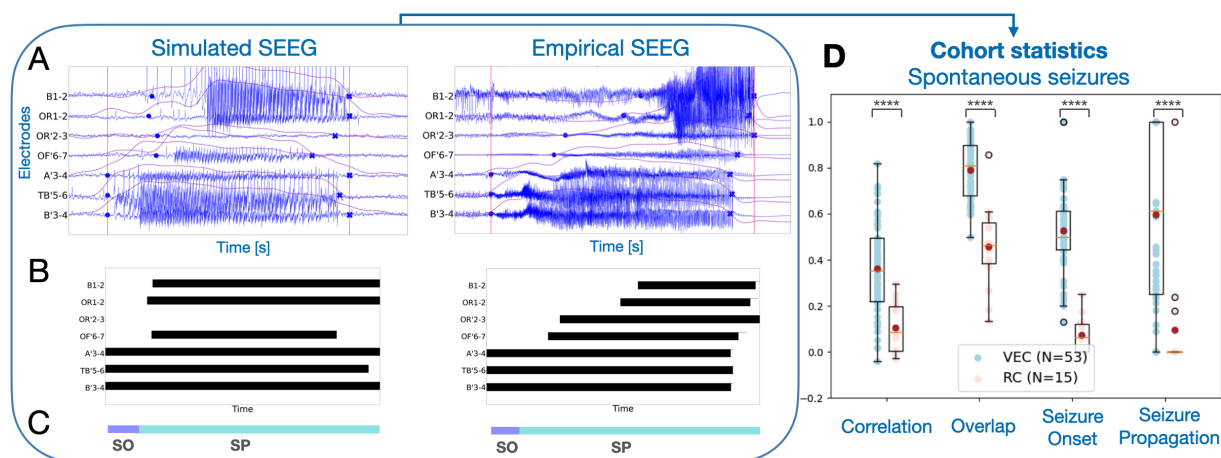

**Figure 3.** Comparison among spontaneous simulated SEEG signals with empirical recordings. A) Left, simulated SEEG seizure. Right, empirical SEEG timeseries of seizure dynamics. For each electrode, the envelope data feature is computed by band-pass filtering the electrical brain signal. Seizure onset and seizure offset time points, shown as blue circles, are computed for each electrode based on the envelope's jump from and return to baseline. B) Each empirical and simulated SEEG electrode is binarized in time, where 0 (white) corresponds to no seizure activity and 1 (black) corresponds to seizure activity. C) The time reference bar is used for both empirical and simulated SEEG to categorize recording electrodes into two groups: SO (Seizure Onset) and SP (Seizure Propagation). An electrode is labeled as SO when its onset time point aligns with the horizontal purple line, typically within the first few seconds of the entire seizure duration. Whereas, an electrode is labeled as SP when its onset time point aligns with the horizontal light blue line. D) Four metrics to quantify the comparison of SEEG recordings in virtual epilepsy cohort (VEC, N = 53 in blue) and the randomized cohort (RC, N=15 in red) against the empirical SEEG recordings. Each point in the plot corresponds to one metric for one empirical and simulated SEEG pair. The dark red point in each metric represents the mean value for each category. Results are shown in box plots, overlaid over individual data points. Middle box represents the interquartile range (IQR), with a line at the median. The whiskers extend from the box to the data point lying within 1.5x the IQR. Points past the whiskers are marked as fliers. \*\*\*\*  $p$  - value < 0.0001; permutation test.



178 right hemisphere. Following the stimulation period, a seizure is triggered in the stimulating electrodes and  
179 other nearby electrodes. The second example consists of a bilateral temporo-frontal seizure from patient 12,  
180 applied using electrodes B3 and B4 (*Figure 4B*). The epileptogenic network is estimated from the spontaneous  
181 seizure of the same patient. The epileptogenic zones are left orbito-frontal-cortex, right F3-pars-opercularis and  
182 right occipito-temporal-sulcus. Propagation zones have an extended network including the right hippocampus-  
183 anterior where the stimulating electrodes are located. Seizure activity is first observed in the right-temporal-  
184 lobe, and later propagates to frontal regions and the contra-lateral hemisphere (B' electrodes located in the  
185 left temporal lobe). In both examples, normalized signal power distribution on reconstructed SEEG electrodes  
186 displays the large network of seizure organization.

## 187 **2.4.2 Evaluating stimulated seizures**

188 We used three approaches to evaluate synthetic stimulated seizures (*Figure 5*). Before comparison, we re-  
189 moved the time series corresponding to the stimulus current and only compared the post-stimulus time series.  
190 In the first approach, similarly to spontaneous seizures, four metrics were compared against a randomized co-  
191 hort (all tested metrics in ??). The randomized cohort was generated using random EZ hypothesis and contains  
192 in total 15 stimulated seizures. Thus, for the same patient, an EZ hypothesis was chosen from a random pa-  
193 tient. Then, we applied the same stimulation parameters to simulate seizure dynamics induced by stimulation.  
194 We employed a permutation test on the comparative metrics that specifically compared means. The results  
195 demonstrate a significantly better performance for the virtual epileptic cohort compared to the randomized co-  
196 hort ( $p < 0.001$ ), as shown in *Figure 5A*. Results with EZ hypothesis based on the clinical hypothesis are presented  
197 in ??B.

198 In the two other approaches, we investigated the role of two stimulation parameters in inducing seizures:  
199 stimulation location and stimulation amplitude. We varied these stimulation parameters and compared the  
200 simulated outcome against the empirical stimulated seizure. We varied stimulation location by randomly se-  
201 lecting 10 electrode pairs from each of four distance groups to stimulate for seven patients, shown in *Figure 5B*.  
202 The distance groups are defined by  $d_e$  the distance from the empirical stimulation location: Dist1:  $d_e \leq 1$ ; Dist2:  
203  $d_e \in [1, 2]$ , Dist3:  $d_e \in [2, 3]$  and Dist4:  $d_e \geq 3$ . For each patient, stimulation parameters are all the same as  
204 their empirical cases, except for the stimulation locations. As stimulation location was selected incrementally  
205 further away from the empirical location, the similarity between the simulated and empirical seizure dynamics  
206 deteriorated, as observed across our four metrics (see also supplementary ??). Both structural connectome  
207 and the EZ network configurations determined the stimulated seizure patterns.

208 For varying stimulation amplitude, we could evaluate the capacity of our model in generating seizure dynam-  
209 ics for a particular stimulation amplitude (*Figure 5C*). For each patient, first, we adjusted the model parameters  
210 to induce seizures by stimulation using the same stimulation amplitude as the empirical case. Then, we varied  
211 stimulation amplitude using common amplitudes used clinically (two lower and two higher amplitudes than  
212 the empirical one) to simulate the signals and evaluate the post-stimulus response by comparing it with the  
213 empirical stimulated seizure. Lower stimulation amplitudes did not induce a seizure, which translated to low  
214 similarity values across metrics. Higher stimulation amplitudes induced synthetic seizures which were similar  
215 to the empirical amplitudes, but longer lasting (see ??).

216 In summary, on average of seven patients, the virtual epileptic cohort is capable of capturing spatio-temporal  
217 features of stimulated seizure data based on its personalized EZ hypothesis, stimulation location and stimula-  
218 tion amplitude.

## 219 **2.5 Interictal spikes**

### 220 **2.5.1 Simulation of interictal spikes**

221 In our virtual epileptic cohort, we simulated brain activity and SEEG recordings during the interictal period for  
222 all 30 patients. We simulated interictal time series based on the EZ hypothesis, such that the EZ network could  
223 generate interictal spiking. We illustrated simulated SEEG and empirical SEEG for patient 8, shown in *Figure 6A*.  
224 The detailed shapes of interictal spikes in both simulated and empirical SEEG are illustrated as well. We also

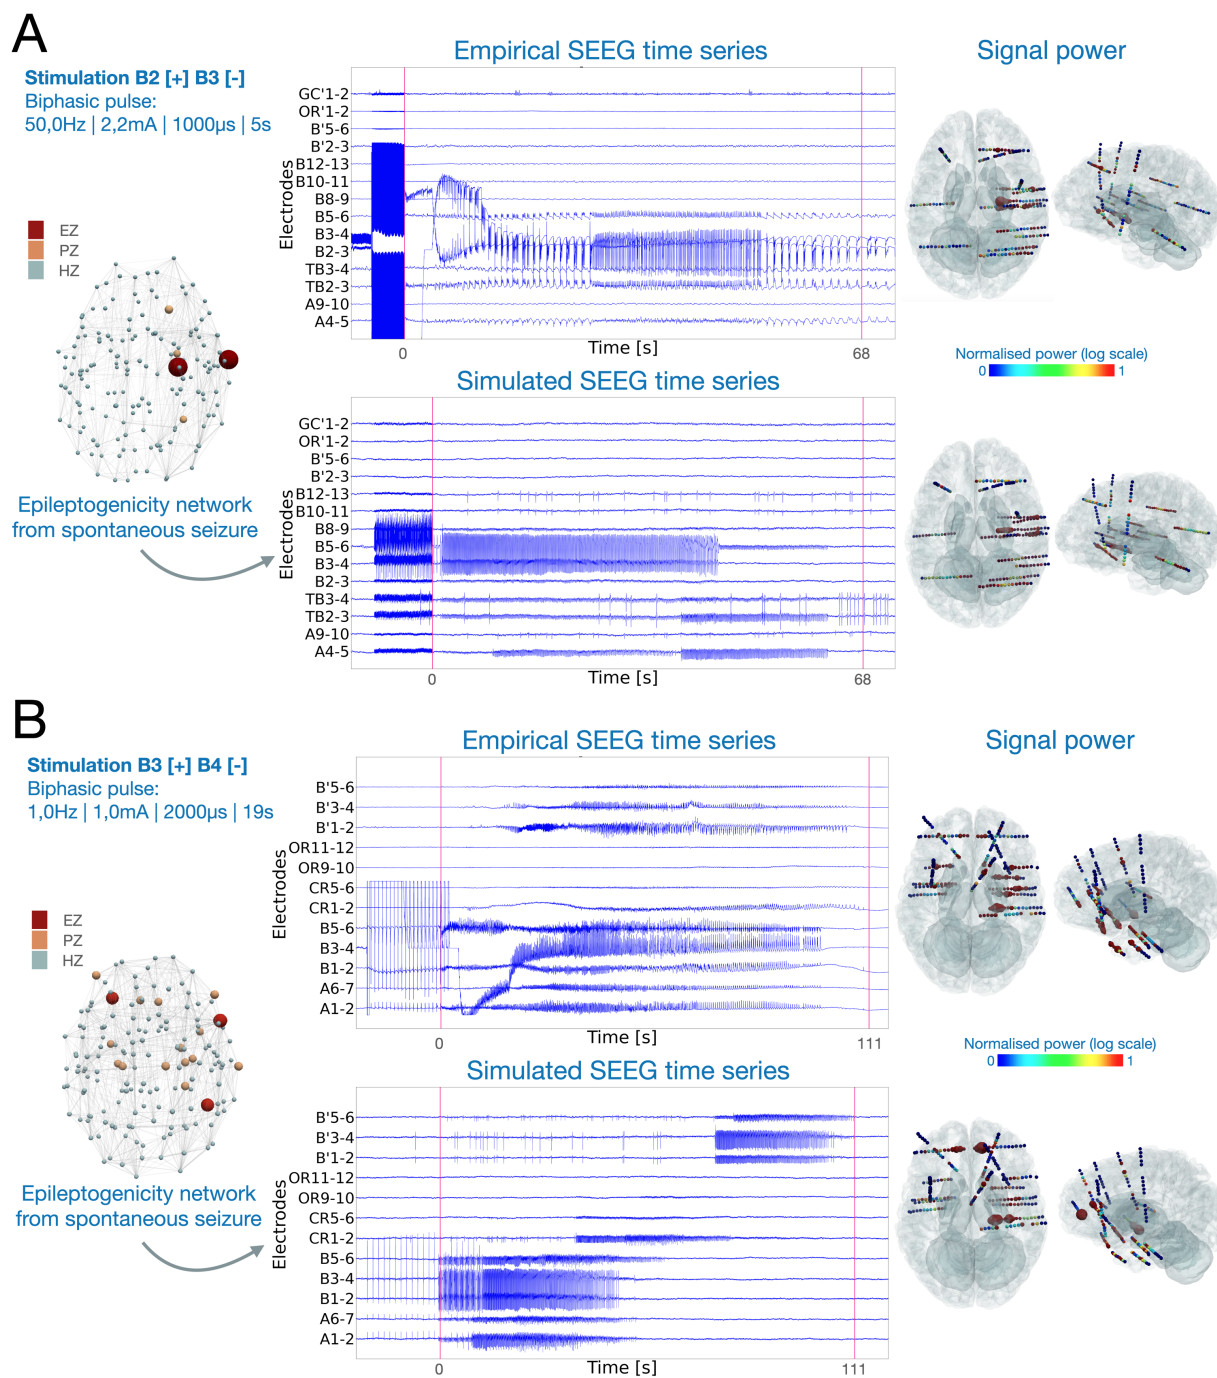

**Figure 4.** Stimulated seizures induced by adjacent SEEG electrodes for two patients with different propagation patterns. A) Focal temporal seizure of patient 3, induced by high-frequency stimulation of electrode pairs B2-B3, located in the right hippocampus anterior. Stimulation waveform is a bipolar pulse applied at 50 Hz frequency, 2.2 mA amplitude, with pulse width of 1 millisecond and 5 second duration. B) Bilateral seizure of patient 12, induced by low-frequency stimulation of electrode pairs B3-B4, also located in the right hippocampus anterior. Stimulation waveform is a bipolar pulse applied at 1 Hz frequency, 1 mA amplitude, with pulse width of 2 milliseconds and 19 second duration. In both A) and B), left-side panels display stimulation parameters, and the epileptogenic network estimated from the spontaneous seizure of the same patient. Red, orange and light blue represent EZ, PZ and HZ respectively. The middle panels show empirical and simulated SEEG time series for a few electrodes. Red vertical lines denote the seizure onset and offset, determined by clinicians for the empirical recordings and by our model in the simulated time series. The right-side panels show the normalized signal power distribution for all channels. Color bar represents signal power, where blue and red represent low and high signal power, respectively.

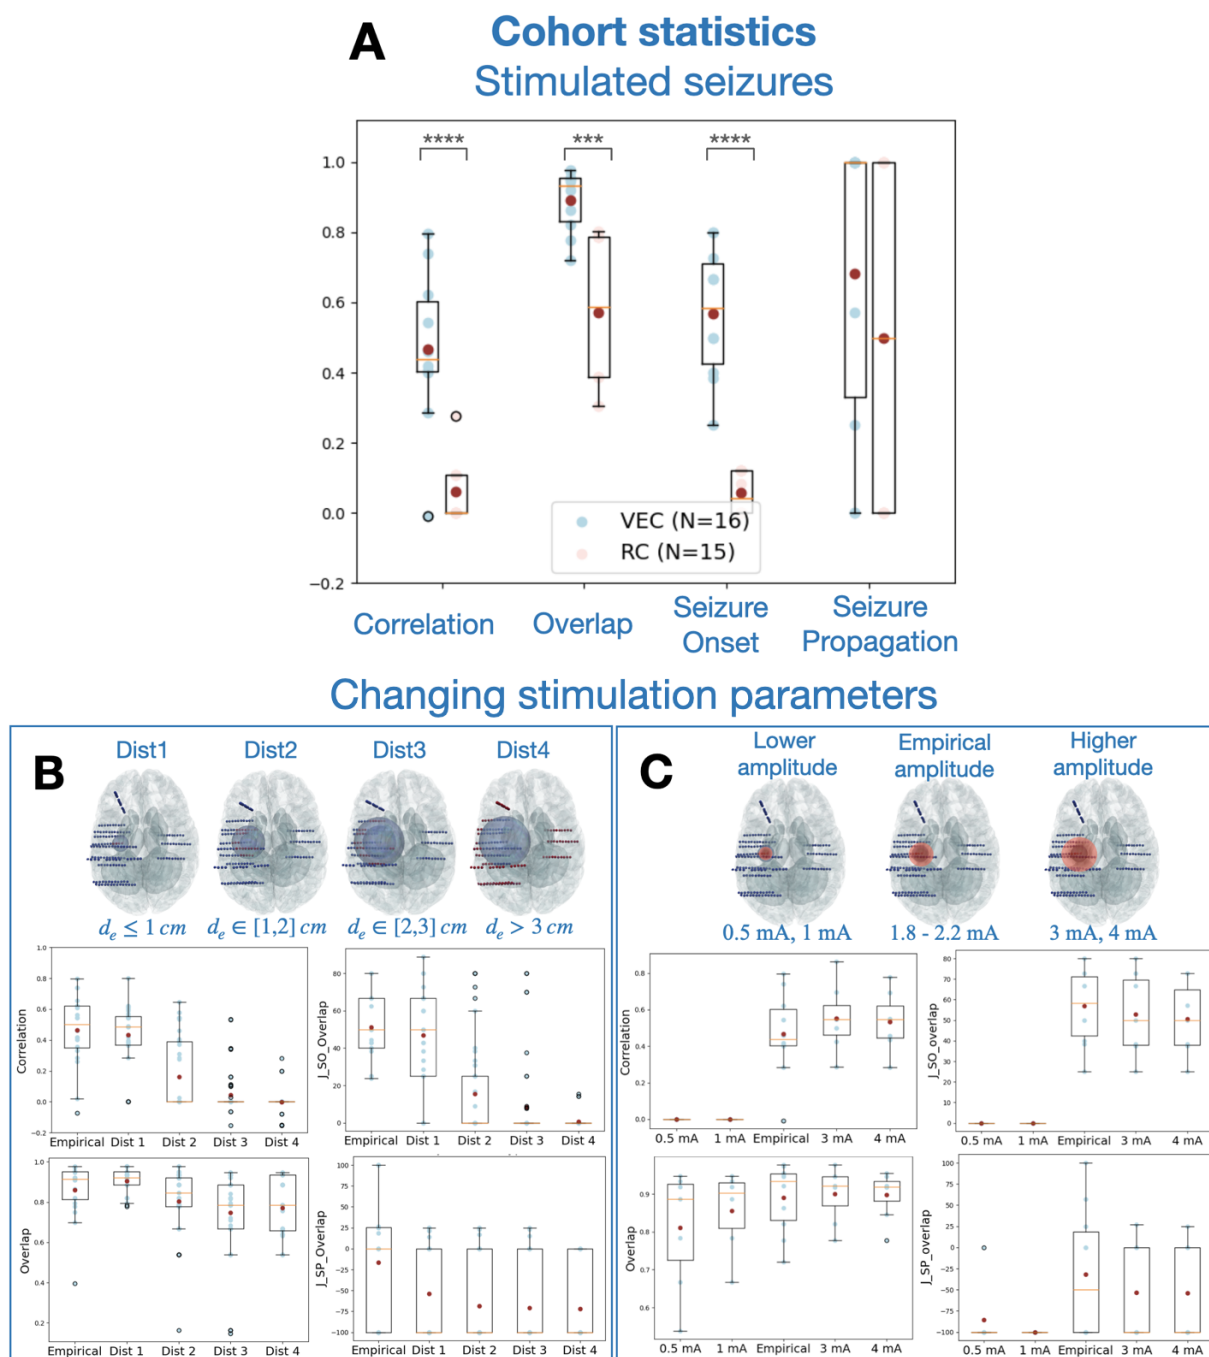

**Figure 5.** Comparison among simulated SEEG signals with empirical recordings for stimulation induced seizures. A) Four metrics to quantify the comparison of stimulated SEEG seizure time-series in virtual epileptic cohort (VEC, N=16 in blue) and the randomized cohort (RC, N=15 in red). Each point in the plot corresponds to one metric comparing one empirical and simulated SEEG pair. Dark red points in each metric represent the mean value. \*\*\*\*  $p$ -value < 0.0001, \*\*\*  $p$ -value < 0.001; permutation test. B) Performance metrics for varying only stimulation locations in seven patients, measured by the distance from the empirical stimulation locations. We randomly stimulated 10 pairs of electrodes within four main distance groups located outside of the empirical locations. If we define  $d_e$  as the distance in cm from the empirical locations, Dist1:  $d_e \leq 1$ ; Dist2:  $d_e \in [1, 2]$ ; Dist3:  $d_e \in [2, 3]$ ; and Dist4:  $d_e \geq 3$ . Four metrics are used to compare the five distance groups in four box plots for seven patients, with individual data points overlaid (in blue). C) Performance metrics for varying only stimulation amplitude in seven patients. Empirical stimulation amplitude varied from 1.8-2.2 mA. Then we performed simulations using the same stimulation parameters but 2 lower amplitudes (0.5 mA, 1 mA) and 2 higher amplitudes (3 mA, 4 mA). Four metrics are used to compare across the five stimulation amplitude groups. In all cases, results are shown in box plots, overlaid over individual data points. Middle box represents the interquartile range (IQR), with a line at the median. The whiskers extend from the box to the data point lying within 1.5x the IQR. Points past the whiskers are marked as fliers.

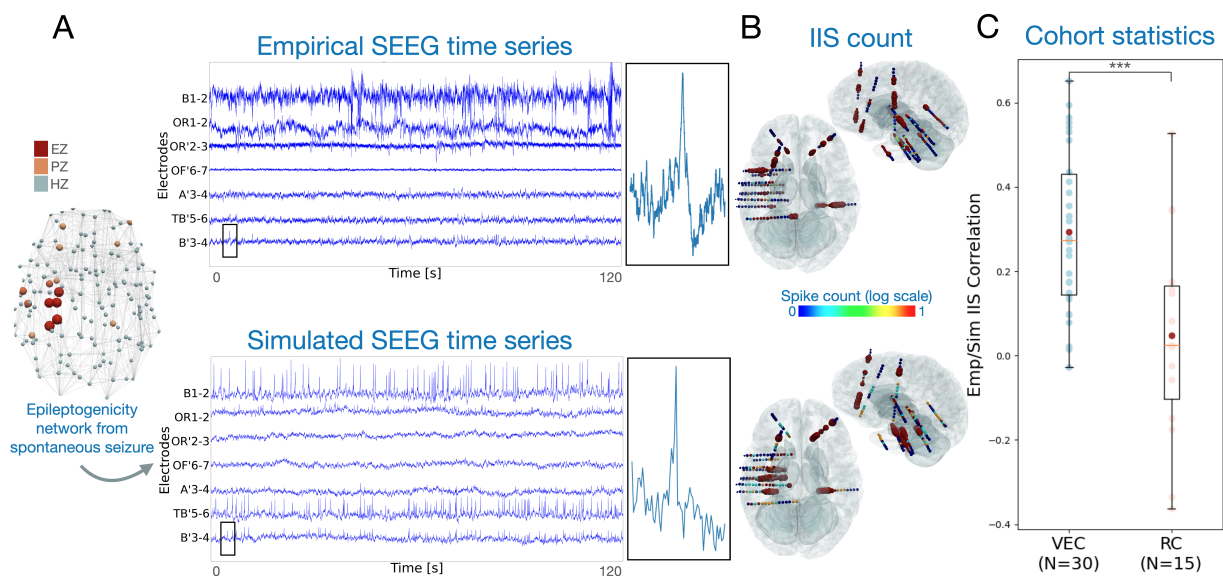

**Figure 6.** A) Interictal activity of one patient shown by SEEG signals in empirical and simulated cases, with interictal spikes in multiple electrodes. One interictal spike is shown by zooming in on channel B'3-4 for both the simulated and empirical cases. B) Interictal spike (IIS) count across all implanted SEEG electrodes are displayed in axial and sagittal view for the simulated and empirical SEEG time series. Spike count values are normalized and displayed in logarithmic scale. C) Boxplots for correlation of simulated and empirical IIS count. Correlation values are plotted for all virtual epileptic cohort patients (VEC, N=30, in blue) and randomized cohort (RC, N=15, in red). Middle box represents the interquartile range (IQR), with a line at the median. The whiskers extend from the box to the data point lying within 1.5x the IQR. Points past the whiskers are marked as fliers. A permutation test was computed to evaluate the significance of the difference between the two group average values, where \*\*\*  $p$ -value < 0.001; permutation test.

225 mapped interictal spike counts across all implanted SEEG electrodes in 3D space (Figure 6B).

## 226 2.5.2 Comparing empirical and simulated interictal spikes

227 To evaluate the simulated interictal spikes, we measured interictal spike count for each SEEG electrode, which  
 228 is the fraction of spikes in each electrode compared to all detected spikes. Spikes are detected after bandpass  
 229 filtering the signal and detecting peaks above calculated thresholds as described by Quiroga et al. (2004). Next,  
 230 we compared the empirical and simulated spike counts across all patients of the virtual epileptic cohort and  
 231 calculated the correlation of their spike counts in the left box of Figure 6C. In addition, we generated a ran-  
 232 domized cohort for 15 patients by using the same brain models but randomly selecting an EZ network from  
 233 other patients in the cohort. We also calculated spike count correlation with the empirical data in the ran-  
 234 domized cohort. Our second approach using the clinical hypothesis was also evaluated in ??C. Permutation testing  
 235 showed a significant difference between the two groups ( $H_0$ : mean(VEC)  $\leq$  mean(RC); p-value < 0.001).

## 236 3 Discussion

237 In this paper, we provided a cohort of 30 virtualized drug-resistant epilepsy patients for hypothesis testing  
 238 and validation. For each patient, we used one virtual brain model to generate synthetic spontaneous seizures,  
 239 stimulation-induced seizures and interictal activity with spikes. Here, we present for the first time synthetic  
 240 seizures induced by stimulation. In addition, we systematically evaluated our synthetic SEEG time series by  
 241 comparing them against their corresponding empirical SEEG recordings. The synthetic SEEG data are simulated  
 242 using personalized brain models, based on patient-specific brain connectivity, alongside reconstructed brain  
 243 sources and SEEG sensors (Proix et al., 2017). We used the Epileptor model, which captures spatio-temporal  
 244 seizure dynamics and interictal spikes. We showed that the synthetic data respect the structure and features of  
 245 the empirical dataset. In particular, we demonstrated that the parameters used to simulate synthetic SEEG data

246 are important in capturing spatio-temporal features of epileptic activity, such as seizure propagation, stimula-  
247 tion outcome and interictal spike count. These parameters serve as ground truth for evaluating data analysis  
248 methods in clinical epilepsy research.

249 The precise mechanisms contributing to seizure emergence are still not fully understood. Studies have  
250 shown that the transition to seizure is a slow process, characterized by a progressive loss of neural network  
251 resilience (*Chang et al., 2018; Rich et al., 2022*), a build-up of low-amplitude high-frequency activity and a pro-  
252 gressively increasing sensitivity of the network to electric stimulation (*Jiruska et al., 2010*). In addition, seizure  
253 generation has been linked to specific changes in ion dynamics such as extracellular potassium (*Fröhlich et al.,*  
254 *2008*), intracellular chloride (*Lillis et al., 2012*) and extracellular calcium (*Wenzel et al., 2019*), although ion  
255 dynamics are highly intertwined (*Raimondo et al., 2015*). We hypothesized that repetitive stimulation leads  
256 to a slow accumulation of ion imbalances which can trigger a seizure. We implemented this behaviour us-  
257 ing the Epileptor model and making  $m$  time-varying, which influences the oscillatory dynamics of the seizure  
258 state (*El Houssaini et al., 2020*). When stimulation is applied,  $m$  slowly increases and when reaching a defined  
259 seizure threshold, it pushes the system to the seizure state (see supplementary ??). In our approach, we tuned  
260 the seizure threshold parameter based on the EZ hypothesis and the empirical stimulation parameters. There-  
261 fore, when modifying only stimulation amplitude the response depends on the accumulation variable crossing  
262 the seizure threshold. Lower stimulation amplitudes failed to cross the defined seizure threshold, whereas  
263 empirical and higher stimulation amplitudes cross this threshold (see supplementary ??). In future studies, this  
264 approach can be extended and be more precise for each patient when more empirical stimulation data are  
265 integrated for model inversion.

266 To ensure the quality and usefulness of the synthetic data, we implemented a set of comparative metrics,  
267 although to the best of our knowledge there is no standard method for validating synthetic data. We focused on  
268 specific data features of the real SEEG signal such as the envelope function, seizure onset and offset times and  
269 interictal spikes. Although these features are important for understanding epileptic brain activity, they could  
270 not account for all the complexity of recorded brain activity. We focused on simple spatio-temporal network  
271 features because, although the Epileptor captures common properties of brain activity during seizures (*Jirsa*  
272 *et al., 2014*), it does not account for all seizure dynamotypes (*Saggio et al., 2020*). This was shown by our metrics,  
273 where empirical data features were captured by the synthetic data, albeit only to a certain extent. However, the  
274 same metrics were applied to a randomized cohort and demonstrated that non-informative parameters fail to  
275 capture the same empirical data features. In addition, our simulations were not biased by surgical outcome  
276 (??).

277 Furthermore, for stimulated seizures, we systematically varied stimulation location and amplitude and com-  
278 pared the outcome against the empirical data. In the clinical setting, these parameters exhibit the greatest  
279 variation. Other parameters such as stimulation frequency are typically chosen as either 1 Hz or 50 Hz, while a  
280 standard range is adhered to for pulse width (0.5-3 ms) and stimulation duration (20-60 sec for 1 Hz stimulation;  
281 3-8 s for 50 Hz stimulation) (*Isnard et al., 2018*). However, the seizure propagation metric (SP) did not perform  
282 as well for stimulated seizures compared to spontaneous seizures, highlighting a limitation of our study. Addi-  
283 tionally, we compared spike count correlations between simulated and empirical interictal data. Despite using  
284 the same EZ parametrization, the average correlation was lower than that of seizure dynamics. This discrep-  
285 ancy may be explained by studies indicating that propagation zones can generate independent interictal spikes,  
286 suggesting the epileptogenic and irritative zone overlap but are not identical (*Bourien et al., 2005; Bartolomei*  
287 *et al., 2016*). The main contribution of these simulated interictal data is their ground truth information that can  
288 be used to evaluate data analysis methods for interictal spikes (e.g. source localization).

289 We used the VEP brain atlas to simulate spatio-temporal seizure dynamics (*Wang et al., 2021*). This con-  
290 strains the complexity of simulated propagation patterns, as compared to empirical SEEG data. Each brain  
291 source represents on average  $\sim 16 \text{ cm}^2$  of the cortical surface. Conversely, neural field models use finer spatial  
292 scales ( $\sim 1 \text{ mm}^2$  of the cortical surface) and consider short-range cortical connections in addition to long-range  
293 white matter connectivity. In addition, dipole orientations of brain sources are not taken into account by the  
294 forward solution used to compute the SEEG time series. The current dipole is mainly attributable to pyramidal  
295 cells in the cortical gray matter and is aligned perpendicular to the brain surface (*Buzsáki et al., 2012*). Neural  
296 field models provide more realistic source to sensor mapping by considering both orientation and distance be-

297 tween the dipole sources and the sensors (*Jirsa, 2009; Proix et al., 2018*). However, unlike neural field models,  
298 neural mass models are typically more efficient in terms of computational resources, simulation duration and  
299 parameter exploration. They remain reliable in capturing various features of brain activity, including seizure  
300 dynamics (*Jirsa et al., 2014; Proix et al., 2018*).

301 In the future, the current dataset can be enriched by other data imaging modalities, such as EEG, MEG  
302 and fMRI, directly through the forward solution on the same brain source signals. Additional data modalities  
303 can also be integrated to better inform the virtual brains and improve the synthetic data, such as PET/SPECT  
304 (*La Fougère et al., 2009*), sodium MRI (*Azilinon et al., 2023*), MEG (*Pizzo et al., 2019*) and high-resolution EEG  
305 (*Kural et al., 2020*). Models that account for a vast combination of clinical seizure patterns (*Saggio et al., 2020*),  
306 or other biophysically grounded models (*Bandyopadhyay et al., 2021; Alonso et al., 2023*) link parameters closer  
307 to underlying biological mechanisms. Replacing neural mass models by neural field models which account for  
308 cortical geometry and short-range connectivity is an additional future goal. This would allow for the integration  
309 of high-resolution brain imaging data (e.g. ultra-high field MRI [ $\geq 7T$ ]) which can improve model creation and  
310 patient specificity (*Jirsa et al., 2023*). Overall, these informative features and modelling approaches can be  
311 integrated in the virtual epileptic cohort to provide a richer repertoire of simulated seizure dynamics.

## 312 **4 Methods and Materials**

### 313 **4.1 Study design**

314 This study consisted of using a cohort of 30 patients with drug-resistant epilepsy alongside a methodology of  
315 personalized virtual brain modeling to build a synthetic copy of the dataset, called the virtual epileptic cohort.  
316 The objective of this study was to provide researchers and other potential users a virtual dataset with ground  
317 truth for testing and validation of their methods. We provided this dataset alongside comparative metrics  
318 between the synthetic and empirical data to gauge the capacity of the virtual cohort in capturing relevant data  
319 features.

320 We used noninvasive T1-MRI and DW-MRI to reconstruct patient-specific whole-brain network models. The  
321 Epileptor (*Jirsa et al., 2014*) model was used to simulate brain activity for each network node. The Epileptor was  
322 extended to account for stimulated seizures, alongside its existing dynamical regimes for interictal and spon-  
323 taneous ictal dynamics. The model's excitability parameter was defined using the EZ hypothesis, which was es-  
324 timated using the VEP pipeline (*Wang et al., 2023*). A second EZ hypothesis was defined from a team of clinical  
325 experts (JM and FB). For each empirical SEEG recording, a synthetic copy was simulated and was either interictal  
326 activity (N=30), spontaneous seizure (N=54) or stimulated seizure (N=16). Simulations were performed on the  
327 whole-brain level and were mapped onto reconstructed SEEG electrodes using a source-to-sensor gain matrix.  
328 Electrode locations were obtained from cranial CT-scan after electrode implantation. The synthetic SEEG time  
329 series were compared against empirical SEEG recordings using 16 metrics comparing spatio-temporal seizure  
330 network dynamics and interictal spike organization. We selected four metrics to describe the main data fea-  
331 tures that were captured, but provided all of them in the supplementary material. To assess to what extent a  
332 personalized EZ hypothesis captured features of the empirical recordings, we constructed a surrogate cohort  
333 of 15 patients using random EZ hypothesis. The randomized cohort was also compared against the empirical  
334 recordings. Then, the virtual epileptic cohort and the randomized cohort metrics were compared and a permu-  
335 tation test was applied for significance testing. Finally, stimulation location and amplitude were systematically  
336 varied in-silico and compared against empirical stimulated seizures.

### 337 **4.2 Patient data**

#### 338 **4.2.1 Empirical patient data**

339 A total of 30 retrospective patients with drug-resistant epilepsy underwent a standard presurgical protocol at  
340 La Timone hospital in Marseille, France. Informed written consent was obtained for all patients in compliance  
341 with ethical requirements of the Declaration of Helsinki. The study protocol was approved by the local Ethics  
342 Committee (Comité de Protection des Personnés sud Méditerranée 1). All patients underwent comprehensive

343 presurgical assessment, including medical history, neurological examination, neuropsychological assessment,  
344 fluorodeoxyglucose-PET, high-resolution 3T-MRI, long-term scalp-EEG, and invasive SEEG recordings. All pa-  
345 tients had invasive SEEG recordings obtained by implanting multiple depth electrodes, each containing 10-18  
346 contacts (2mm long) separated by 1.5- or 5-mm contact spacing. The SEEG recordings were performed as part  
347 of routine clinical management, in line with French national guidelines (*Isnard et al., 2018*). Recordings were  
348 stored separately for each seizure, with seizure onset and offset times marked by expert epileptologists. For  
349 stimulation-induced seizures, stimulation parameters (channels, frequency, amplitude, pulse width and du-  
350 ration) were additionally provided. SEEG recordings during rest were stored separately. Following electrode  
351 implantation, a cranial CT-scan was performed to obtain locations of electrodes in the brain.

#### 352 4.2.2 Virtual Epileptic Cohort data

353 The virtual epileptic cohort of 30 patients is provided in a BIDS-iEEG compatible format (*Holdgraf et al., 2019*).  
354 Following this format, each patient's synthetic data are saved into two categories: simulated data and derived  
355 data. The simulated data contains simulated SEEG time series. The derived data contains structural information  
356 extracted from brain imaging scans (T1-MRI, DW-MRI and CT-scan) and underlying model parameters used to  
357 generate the simulated data.

358 For each patient, synthetic SEEG time series are provided in BrainVision format (**ieeg** folder in supplement-  
359 ary ??). These synthetic time series are grouped into three different folders for each type (*ses-01*: simulated  
360 seizure, *ses-02*: stimulated seizure, *ses-03*: stimulated interictal spikes). Each synthetic SEEG file contains the EZ  
361 hypothesis type used in its filename (*VEPhypothesis* or *ClinicalHypothesis*). Also, if multiple synthetic SEEG files  
362 are provided, they each have a unique run number (starting from run-01). For all synthetic SEEG files, electrode  
363 names and coordinates are provided as *tsv* files. For every patient, the number of simulated brain activities for  
364 each condition are summarized in Table 1.

365 In addition, we provided structural information (**struct** folder in supplementary ??), notably their connec-  
366 tome and gain matrix. The connectome comes in the form of a zip file (TVB-compatible data format) and con-  
367 tains information about connectivity weights (MxM matrix, M=162 brain regions), connectivity centers, center  
368 orientations, connectivity areas and volumes, tract lengths and cortical/non-cortical region flags (for more in-  
369 formation, see *TVB-UserGuide (2024)*). The gain matrix is saved as a *tsv* file, this MxN matrix contains M regions  
370 and N sensors and maps the simulated brain activity from the brain region level to the SEEG sensors, thus  
371 obtaining synthetic SEEG time series.

372 Finally, corresponding model and simulator parameters are provided for each synthetic SEEG file (**parameters**  
373 folder in supplementary ??). Stimulation parameters are also provided for stimulation-induced synthetic seizures.  
374 The synthetic time series on the brain source level are also provided for each synthetic SEEG file. A VEP atlas  
375 (*Wang et al., 2021*) is provided as a *tsv* file for mapping source labels to brain region names.

#### 376 4.3 Data processing

377 The data processing method used here has been described in *Wang et al. (2023)*. Here, we briefly explain the  
378 method used. To construct the virtual epileptic patients, we first preprocessed the T1-MRI and DW-MRI data.  
379 Volumetric segmentation and cortical surface reconstruction were obtained from the patient-specific T1-MRI  
380 data using the recon-all pipeline of the FreeSurfer software package. The cortical surface was parcellated ac-  
381 cording to the VEP atlas (code available at [https://github.com/HuifangWang/VEP\\_atlas\\_shared.git](https://github.com/HuifangWang/VEP_atlas_shared.git)). We used the  
382 MRtrix software package to process the DW-MRI, employing an iterative algorithm to estimate the response  
383 functions and subsequently used constrained spherical deconvolution to derive the fiber orientation distribu-  
384 tion functions. The iFOD2 algorithm was used to sample 15 million tracts. The structural connectome was  
385 constructed by assigning and counting the streamlines to and from each VEP brain region. This results in a  
386 162x162 connectivity matrix which is symmetric (there is no directionality information available in the white  
387 matter fibers). The diagonal entries of the connectome matrix were set to 0 to exclude self-connections within  
388 areas and the matrix was normalized so that the maximum value was equal to one. We obtained the location  
389 of the SEEG contacts from post-implantation CT scans using GARDEL as part of the EpiTools software package

390 (Villalon et al., 2018). Then we coregistered the contact positions from the CT scan space to the T1-MRI scan  
391 space of each patient.

#### 392 4.4 Neural mass models

393 A neural mass model describes the activity of a population of neurons, thus it can describe the local activity of  
394 a brain region. It is defined by a set of differential equations that govern their dynamics. Just like brain regions  
395 are connected through long range white fibers, neural masses are linked through the structural connectome  
396 to form a whole brain network. The global equation for such a model can be given by

$$\dot{\psi}_i(t) = F(\psi_i(t)) + K \sum_{j=1}^L W(i, j) S(\psi_i(t), \psi_j(t)) \quad (1)$$

397 where  $\psi_i(t)$  is a state vector of neural activity at brain region  $i$  and time  $t$ .  $\dot{\psi}$  is the temporal derivative of  
398 the state vector.  $F$  is a function of the state and captures the local neural activity. In our case,  $F$  reflects the  
399 Epileptor model, described above.  $W$  is a matrix of heterogeneous connection strengths between node  $i$  and  
400  $j$ .  $S$  is a coupling function of the local state  $\psi_i$  and the distant delayed state  $\psi_j$ . That a node receives input  
401 through the network is given by the sum across the number of nodes  $L$  and scaled by a constant  $K$ . In this  
402 paper, this set of differential equations is solved using an Euler integration scheme with a step size of 0.5 ms.

##### 403 4.4.1 Forward solution with neural mass models

404 Mapping the neural activity from the sources (VEP brain regions) to the sensors (SEEG contacts) is done by  
405 solving the forward problem and estimating a source-to-sensor matrix (gain matrix). As sources for our model,  
406 we used the vertices of the pial surface and volume bounding surfaces for the cortical and subcortical regions  
407 respectively. Surfaces are represented as triangular meshes. We estimate that the matrix  $g_{j,k}$  from source brain  
408 region  $j$  to sensor  $k$  is equal to the sum of the inverse of the squared Euclidean distance  $d_{i,k}$  from vertex  $i$  to  
409 sensor  $k$  weighted by the area  $a_i$  of the vertex on the surface.

$$g_{j,k} = \sum_{i=0}^{N_j} \frac{a_i}{d_{i,k}^2} \quad (2)$$

410 Here vertex  $i$  belongs to region  $j$  which has  $N_j$  vertices in total. The area  $a_i$  of vertex  $i$  is obtained by sum-  
411 ming up one-third of the area of all the neighboring triangles. Vertices belonging to the same brain region  
412 are summed to obtain the gain for a single region of our brain network model. The resulting gain matrix has  
413 dimensions  $M \times N$ , with  $M$  being the number of regions and  $N$  the number of sensors. Matrix multiplication of  
414 the simulated source activity with the gain matrix yields the simulated SEEG signals.

#### 415 4.5 The Epileptor model

416 We used whole brain network models to generate synthetic SEEG time series. Within a brain network model,  
417 each brain region is represented as a node and the connections between regions are represented as edges.  
418 The brain regions are obtained by the FreeSurfer parcellation using the VEP atlas. The connection strength  
419 between regions is inferred from the structural connectome derived from DW-MRI data. The brain activity of  
420 each brain region is represented by a neural mass model, here we used the phenomenological 6D Epileptor  
421 model. There are 6 coupled differential equations in this model, which model 3 neural populations acting on a  
422 fast, intermediate and slow time scale.



$$\begin{aligned}
 \dot{x}_1 &= y_1 - f_1(x_1, x_2) - z + I_{ext1} \\
 \dot{y}_1 &= c - dx_1^2 - y_1 \\
 \dot{x}_2 &= -y_2 + x_2 - x_2^3 + I_{ext2} + 0.002g - 0.3(z - 3.5) \\
 \dot{y}_2 &= \frac{1}{\tau}(-y_2 + f_2(x_2)) \\
 \dot{z} &= r(4(x_1 - x_0) - z + f_3(z) + K \sum_{j=1}^N C_{i,j}(x_1^j - x_1^i)) \\
 \dot{g} &= -0.01(g - 0.1x_1)
 \end{aligned}$$

where

$$\begin{aligned}
 f_1(x_1, x_2) &= \begin{cases} ax_1^3 - bx_1^2 & \text{if } x_1 < 0 \\ -(m - x_2 + 0.6(z - 4)^2)x_1 & \text{if } x_1 \geq 0 \end{cases} \\
 f_2(x_2) &= \begin{cases} 0 & \text{if } x_2 < -0.25 \\ a_2(x_2 + 0.25) & \text{if } x_2 \geq -0.25 \end{cases} \\
 f_3(z) &= \begin{cases} -0.1z^7 & \text{if } z < 0 \\ 0 & \text{if } z \geq 0 \end{cases}
 \end{aligned} \tag{3}$$

423 The state variables  $x_1$  and  $y_1$  describe the activity of the neural population acting on a fast time scale to  
 424 model fast discharges during epileptic seizures. The state variables  $x_2$  and  $y_2$  describe the activity of the neural  
 425 population acting on an intermediate time scale to model spike and wave phenomena during seizures. The  
 426 state variable  $z$  acts on a slow time scale and drives the system autonomously in and out of the ictal state. In  
 427 addition, the state variable  $g$  acts as a low-pass filter of the coupling from  $x_1$  to  $x_2$  and generates the preictal  
 428 and ictal spikes.

429 The excitability parameter  $x_0$  represents the degree of epileptogenicity and determines whether the system  
 430 converges towards an ictal or healthy state. If  $x_0 > x_{0c}$ , where  $x_{0c}$  is the critical value of epileptogenicity, the  
 431 Epileptor shows seizure activity autonomously and is referred to as epileptogenic; otherwise the Epileptor is  
 432 in its (healthy) equilibrium state and does not trigger seizures autonomously. The default parameters are  
 433  $r = 0.00035$ ,  $\tau = 10$ ,  $I_{ext1} = 3.1$ ,  $I_{ext2} = 0.45$ ,  $a = 1$ ,  $a_2 = 6$ ,  $b = 3$ ,  $c = 1$ ,  $d = 5$  and  $m = 0$ .

434 In addition, the Epileptor model is coupled to  $N$  other Epileptors via a linear approximation of permittivity  
 435 coupling  $K \sum_{j=1}^N C_{i,j}(x_1^j - x_1^i)$ . In this coupling term,  $K$  scales the global connectivity and can be varied between  
 436 simulations to investigate different scenarios. The patient's connectome is represented by  $C_{i,j}$  which defines  
 437 region-to-region connection weights.

#### 438 4.6 The Epileptor-stimulation model

439 To model stimulated seizures, we needed to determine the relationship between stimulus and brain activity.  
 440 During stimulated seizures, we observed a slow increase in oscillatory response, followed by a sudden switch  
 441 to the seizure state, likely due to ion imbalances (e.g., extracellular potassium) reaching a critical threshold.  
 442 To model this, We used the phenomenological Epileptor model. We transformed the parameter  $m$  into a vari-  
 443 able that accumulates stimulus effects slowly which influences the excitability of the model. When reaching a  
 444 critical seizure threshold value  $m_{thresh}$  it can push the system from its normal state to the seizure state via the  
 445 permittivity variable  $z$ , which guides the system in and out of seizures (see supplementary ??). The extended  
 446 Epileptor-stimulation model is as follows:

$$\begin{aligned}
 \dot{x}_1 &= y_1 - f_1(x_1, x_2) - z + I_{ext1} + nI_{stim} \\
 \dot{y}_1 &= c - dx_1^2 - y_1 \\
 \dot{x}_2 &= -y_2 + x_2 - x_2^3 + I_{ext2} + 0.002g - 0.3(z - 3.5) \\
 \dot{y}_2 &= \frac{1}{\tau}(-y_2 + f_2(x_2)) \\
 \dot{z} &= r(4(x_1 - x_0 - H(m - m_{thresh}))) - z + f_3(z) + K \sum_{j=1}^N C_{i,j}(x_1^j - x_1^i) \\
 \dot{g} &= -0.01(g - 0.1x_1) \\
 \dot{m} &= r_2(k|I_{stim}| - 0.3m)
 \end{aligned}$$

where

$$f_1(x_1, x_2) = \begin{cases} ax_1^3 - bx_1^2 & \text{if } x_1 < 0 \\ -(m - x_2 + 0.6(z - 4)^2)x_1 & \text{if } x_1 \geq 0 \end{cases}$$

$$f_2(x_2) = \begin{cases} 0 & \text{if } x_2 < -0.25 \\ a_2(x_2 + 0.25) & \text{if } x_2 \geq -0.25 \end{cases}$$

$$f_3(z) = \begin{cases} -0.1z^7 & \text{if } z < 0 \\ 0 & \text{if } z \geq 0 \end{cases}$$

447 All default parameters are the same as in the original Epileptor model, except for the additional parameters:  
 448  $m_{thresh} = 1.5$ ,  $k = 20$ ,  $r = 0.00035$ ,  $r_2 = 0.006$ ,  $n = 3$ ,  $x_0 = -2.2$ . The Epileptor-stimulation model is coupled to N  
 449 other Epileptors-stimulation using the same permittivity coupling described in the previous section.  $I_{stim}$  is  
 450 a time varying input describing the perturbation signal at each time step, and matches the clinically applied  
 451 stimulus waveform. Spatially, it is weighted by a scalar corresponding to the estimated electric field magnitude  
 452 for each brain region (for more detail, see the subsection below).  $H$  is the Heaviside function,  $m_{thresh}$  is the  
 453 threshold for  $m$  which when crossed changes the state of the system by pushing it in the upstate.

#### 454 4.7 Calculation of the electric field of SEEG stimulation

455 The French guidelines on SEEG stimulation state that bipolar and biphasic current should be used between  
 456 two contiguous contacts to target a region of interest (*Isnard et al., 2018*). In this setting, one contact acts as a  
 457 cathode (negative electric potential, sink of current) and the other one as an anode (positive electric potential,  
 458 source of current). Current flows from the anode to the cathode, hyperpolarizing the neural elements nearest  
 459 the anode and depolarizing the neural elements nearest the anode. This generates a local electric field in the  
 460 area where the electrodes are located. A bipolar configuration is preferred for SEEG stimulation because it may  
 461 be less likely to elicit side effects thanks to the current being more focused than a monopolar configuration  
 462 and less likely to spread into adjacent structures (*Kovac et al., 2016; Kuncel and Grill, 2004*). A symmetrical  
 463 biphasic pulse waveform is used to reduce tissue damage by producing a zero net-charge. The parameters  
 464 used clinically are restricted to frequencies of either 1 Hz or 50 Hz, weak amplitudes ranging from 0.5 to 5  
 465 mA, and pulse widths of 500 - 3000 microseconds and duration of 0.5-40 seconds (short duration for 50 Hz  
 466 stimulation and longer duration for 1 Hz stimulation).

467 We modeled the stimulus that was clinically applied by generating a bipolar signal following the stimulation  
 468 parameters. The electric field generated by the stimulus was estimated by approximating the electrode con-  
 469 tacts as point sources ( $q_+$  and  $q_-$ ), which is sufficiently accurate for our neural mass modeling approach (*Alonso*  
 470 *et al., 2023*). We then mapped the stimulus signal onto the parcellated brain areas based on the distance, re-  
 471 sulting in an estimated electric field at the whole-brain level. We used the estimated field magnitude  $|\vec{E}(\vec{r})|$  as

472 an input to the  $I_{stim}$  parameter of the Epileptor-stimulation model (4). The field magnitude at a brain location  $\vec{r}$   
473 is computed as:

$$|\vec{E}(\vec{r})| = |kq(\frac{\vec{r} - \vec{r}_{q+}}{|\vec{r} - \vec{r}_{q+}|^3} - \frac{\vec{r} - \vec{r}_{q-}}{|\vec{r} - \vec{r}_{q-}|^3})| \quad (5)$$

#### 474 **4.8 Spontaneous seizures**

475 To simulate brain dynamics for each patient, we used their virtual brain model and the extended Epileptor  
476 model, parametrized by the patient's EZ hypothesis. The EZ hypothesis was based on the VEP pipeline as a first  
477 approach and on the clinical hypothesis as a second approach.

478 To obtain spontaneous seizures, two main parameters were adjusted in the Epileptor model:  $x_0$  and  $K$ .  
479 Firstly, the  $x_0$  parameter determines regional excitability. To simulate spontaneous seizures, the epileptogenic-  
480 ity heatmap obtained from the EZ hypothesis was translated into  $x_0$  parameter values. For this, normalized  
481 epileptogenicity values were linearly transformed into an  $x_0$  range of  $[-2.2, -1.2]$ , such that seizures occurred  
482 autonomously. For  $x_0$  values below  $-2.062$  the model settles into a fixed point in the down-state which corre-  
483 sponds to an interictal state. For  $-2.062 < x_0 < -1.025$  the model generates a stable oscillation in the up-state  
484 which corresponds to a seizure-like event (SLE). For  $x_0$  values above  $-1.025$  the model settles into a stable fixed  
485 point in the up-state. The brain regions that are epileptogenic have  $x_0$  values corresponding to the SLE state  
486 and brain regions that are non-epileptogenic have values corresponding to the interictal state.

487 Secondly, the global coupling parameter (noted as  $K$ ) is a key parameter which influences the resulting  
488 seizure dynamics. This parameter adjusts the coupling strength between nodes, which are connected to each  
489 other via a fast-to-slow coupling, also known as permittivity coupling (*Proix et al., 2018*). This parameter is  
490 adjusted according to the empirical SEEG recordings. Both  $x_0$  and  $K$  determine the simulated spatiotemporal  
491 seizure dynamics. For instance, seizures can propagate to non-epileptogenic areas if they're connected to  
492 epileptogenic areas. It can also happen than seizures do not propagate to an epileptogenic area in particular  
493 cases when that area is connected to multiple healthy regions, which act as seizure inhibitors.

#### 494 **4.9 Stimulated seizures**

495 To generate stimulated seizures, we adjusted the parameters  $x_0$ ,  $m_{thresh}$  and  $I_{stim}$ . The parameter  $K$  value was the  
496 same as in the spontaneous seizure. We used the same epileptogenicity heat map from the EZ hypothesis of the  
497 spontaneous seizures. To trigger seizures by external stimulation rather than them occurring spontaneously,  
498 we set the excitability  $x_0$  values to a sub-critical threshold for seizing, linearly mapping them to an  $x_0$  range of  
499  $[-2.2, -2.07]$ . The seizure threshold  $m_{thresh}$  parameter was also set from the EZ hypothesis, by linearly mapping  
500 them to a  $[0.5, 10]$  range. Epileptogenic brain regions have lower seizure thresholds than healthy brain regions.

501 Bipolar current stimulation via SEEG electrodes is applied in order to trigger seizures for epileptogenic zone  
502 diagnosis. For this, clinicians stimulate across multiple electrode pairs and across stimulation parameters. This  
503 is not done systematically, it rather follows the clinician's hypothesis of the epileptogenic zone and their ex-  
504 perience with stimulation parameters. We have selected the clinical stimulation parameters which induced  
505 a seizure in the patient. We used the same stimulation electrodes and stimulation parameters in our model.  
506 The generated effects of the stimulus are mapped onto the brain regions using the sensor-to-source forward  
507 solution. This resulted in an estimated electric field magnitude, represented as scalar weights across brain re-  
508 gions, with the strongest weights located near the stimulating electrode pair. The  $I_{stim}$  parameter was defined  
509 for each brain region depending on the stimulus weights. It then varied in time following the stimulus bipolar  
510 waveform. The variable  $m$  is related to regional excitability and it depends on this parameter. When  $I_{stim}$  is  
511 non-zero,  $m$  slowly increases, otherwise it slowly returns to baseline. When  $m > m_{thresh}$ , the system is pushed to  
512 the seizure state. Then, the structural connectivity influences the spatio-temporal triggered seizure dynamics.

#### 513 **4.9.1 Varying stimulation location**

514 We wanted to interrogate the robustness of our model by systematically changing stimulation location and  
515 comparing the outcome to the empirical stimulation-induced seizure. For this we followed the following steps

516 for each of seven patients which had stimulation-induced seizures in the clinic.

517 We used the same brain models for each patient that were used for the virtual epileptic cohort. We repro-  
518 duced the same parameters using the VEP hypothesis, taken from the cohort's **derivatives** database, with the  
519 only free parameter being stimulation location. To define this parameter, we grouped all SEEG contacts into  
520 four categories using the empirical stimulation location as a reference point. If we define  $d_e$  as the distance in  
521 cm from the empirical stimulation location, Dist1:  $d_e \leq 1$ ; Dist2:  $d_e \in [1, 2]$ ; Dist3:  $d_e \in [2, 3]$ ; and Dist4:  $d_e \geq 3$ .  
522 Next, we randomly stimulated up to 10 pairs of electrodes within the four main distance groups located outside  
523 of the empirical location. This resulted in up to 40 simulations containing the modelled stimulation input and  
524 whole-brain response (induced seizure or no seizure).

525 The comparative metrics between the synthetic SEEG stimulation responses and the empirical SEEG stimulation-  
526 induced seizure were performed (**Figure 5**). In total, 243 simulations were generated and compared against  
527 the empirical SEEG recordings.

#### 528 **4.9.2 Varying stimulation amplitude**

529 We wanted to interrogate the robustness of our model by systematically changing stimulation amplitude and  
530 comparing the outcome to the empirical stimulation-induced seizure. For this we followed the following steps  
531 for each of seven patients which had stimulation-induced seizures in the clinic.

532 We used the same brain models for each patient that were used for the virtual epileptic cohort. We repro-  
533 duced the same parameters using the VEP hypothesis, taken from the cohort's **derivatives** database, with the  
534 only free parameter being stimulation amplitude. In the empirical stimulation parameters, all patients had a  
535 stimulation amplitude between 1.8 mA and 2.2 mA (mean=2 mA, std=0.12). We varied this parameter at the fol-  
536 lowing amplitudes: 0.5 mA, 1 mA, 3 mA and 4 mA. We ran simulations for each stimulation amplitude, resulting  
537 in four simulations per patient containing the modelled stimulation input and whole brain response (induced  
538 seizure or no seizure).

539 The comparative metrics between the synthetic SEEG stimulation responses and the empirical SEEG stimulation-  
540 induced seizure were performed (**Figure 5**). In total, 28 simulations were generated and compared against the  
541 empirical SEEG recordings.

#### 542 **4.10 Interictal spikes**

543 We generated interictal activity for each patient, containing normal activity with interictal spiking in certain  
544 locations. We adjusted the parameters  $I_{ext}$  and  $x_0$ . We used the same global coupling parameter  $K$  of the  
545 spontaneous seizures.

546 We set  $I_{ext} = 6.0$  and mapped the epileptogenicity values to an  $x_0$  range of  $[-3, -2.8]$ , with additive stochastic  
547 noise for irregular spiking. This allowed for interictal spikes to be obtained by the model, but it is not the only  
548 method (**El Houssaini et al., 2020**). The combination of  $x_0$  values close to the seizure threshold alongside the  
549 structural connectivity scaled by  $K$  yields the interictal zone network for each patient. This results in interictal  
550 spike time series which are personalised to each patient.

551 The present literature relates the epileptogenic zone network to the interictal spike network (**Bourien et al.,**  
552 **2005**). Thus, we used the epileptogenicity heat map obtained from both the VEP hypothesis and the clinical  
553 hypothesis to set the EZN close to the critical threshold for seizure-like events.

##### 554 **4.10.1 Interictal spike detection**

555 A spike is defined as a transient distinguished from background activity, with pointed peak and duration be-  
556 tween 20-70 ms and varying amplitude typically  $> 50 \mu V$  (**Kane et al., 2017**). A bandpass butterworth noncasual  
557 filter was applied on the data (lowcut 1 Hz, highcut 70 Hz). To detect a spike, we looked for the peaks of the  
558 signal which crossed a defined threshold. The threshold was defined following the spike detection method in  
559 (**Quiroga et al., 2004**). If we define  $|x|$  as the bandpass-filtered signal, then the threshold is equal to  $4\sigma$ , where  
560  $\sigma = \text{median}\left\{\frac{|x|}{0.6745}\right\}$ . In this case,  $\sigma$  is an estimate of the standard deviation of the background noise. The stan-  
561 dard deviation of the signal could lead to very high threshold values, especially in cases with high firing rates

562 and large spike amplitudes. By using the estimation based on the median, the interference of the spikes is  
563 diminished (see a demo in *Quiroga et al. (2004)*). In the empirical spike case, we only took spikes that had an  
564 amplitude above  $25 \mu V$ . In addition, if two or more peaks were detected within 250 ms (or 256 timesteps in our  
565 algorithm) they were counted as a single spike, to ensure that poly-spikes are not counted as multiple spikes.

#### 566 **4.10.2 Estimation of interictal spike count**

567 To evaluate the synthetic interictal time series, we compared their interictal spike count (IIS) against the empir-  
568 ical recording. We used 15 minutes of SEEG interictal activity and 10000 timesteps of synthetic SEEG interictal  
569 time series, with a step size 0.05.

570 If the total number of spikes for a channel  $i$  is  $S_i$  and there are  $N$  channels, then the IIS for that channel was  
571 computed as follows,

$$IIS_i = \frac{S_i}{\sum_{i=1}^N S_i} \quad (6)$$

572 As a result, we obtained two vectors of length  $N$ , containing the interictal spike count for the synthetic and  
573 the empirical SEEG time series. We compared these two vectors using the Pearson correlation coefficient.

#### 574 **4.11 Randomized cohort**

575 We generated three randomized cohorts for each simulation type: spontaneous seizures, stimulation induced  
576 seizures and interictal spikes. Each randomized cohort contained in total 15 synthetic SEEG time series for  
577 each EZ hypothesis (VEP hypothesis or Clinical hypothesis). The following approach was applied to generate  
578 one randomized cohort.

579 First, for each patient, the same parameters used to run the virtual epileptic cohort simulations were reused  
580 with the exception of the parameter  $x_0$ . For this parameter, instead of using the patient's own EZ hypothesis,  
581 we select it randomly from another virtual epileptic cohort patient of the cohort. This operation was performed  
582 3 times for each patient. Thus, 3 synthetic simulations are obtained for each patient using a random EZ hypoth-  
583 esis.

584 Next, we compared the synthetic SEEG seizure from the randomized cohort with the empirical SEEG record-  
585 ing of that patient. If the patient has multiple SEEG recordings for the same type, we select one and we compare  
586 all 3 simulations to this SEEG simulation. We do this because seizure features and interictal features within the  
587 same patient tend to be more similar than those between patients.

588 We followed this procedure for 5 patients of our cohort, resulting in 15 simulated seizures for each EZ  
589 hypothesis. We used the randomized cohort simulations to compute similarity metrics between the empirical  
590 and simulated data. We then compared the same metrics between the virtual epileptic cohort and the random-  
591 ized cohort. The virtual epileptic cohort cohort showed a significantly higher resemblance with the empirical  
592 seizure features as compared to the randomized cohort. This shows that patient-specific EZ hypothesis plays  
593 an important role for simulating spatio-temporal seizure dynamics.

#### 594 **4.12 Comparing simulated and empirical SEEG traces**

595 To compare the simulated SEEG time series to the empirical SEEG recording we first captured spatio-temporal  
596 features in both data. First, we computed an envelope function for each SEEG electrode as explained in *Wang*  
597 *et al. (2023)* (see also supplementary ??). We used this envelope to mark each electrode as either seizure  
598 (containing seizure activity) or non-seizure (not containing any seizure activity) electrode. If the envelope's peak  
599 amplitude crossed a determined threshold, the SEEG electrodes were marked as seizure electrodes, otherwise  
600 they were marked as non-seizure electrodes. The threshold was the same for all electrodes and it was manually  
601 determined to be higher than the envelope's baseline amplitude. We compared the overlap of seizure and non-  
602 seizure electrodes between the simulated and empirical SEEG. In the electrodes where seizure activity was  
603 marked, we used the timepoints when the envelope jumped from its baseline and returned back to baseline  
604 to mark seizure onset and offset, respectively. Using this information, we binarized all SEEG traces in time: 0

605 for no seizure, 1 for seizure (**Figure 3B**). We then compared the binarized simulated and empirical SEEG using  
606 2D pearson correlation.

607 Next, we divided SEEG electrodes marked as seizure electrodes into two groups: seizure onset (SO) and  
608 seizure propagation (SP) electrodes (**Figure 3C**). A seizure electrode was marked as SO when its onset time was  
609 belonged to the first few seconds of the total seizure length (corresponding to the first 5-15% of the total seizure  
610 duration), otherwise it was marked as SP. Then, the Jaccard similarity coefficient was employed to compare  
611 synthetic and empirical SO groups, and synthetic and empirical SP groups.

612 We computed these measurements for each pair of simulated SEEG and it's corresponding empirical SEEG,  
613 for both the spontaneous and stimulation-induced seizures. We repeated the same measurements for both the  
614 Virtual Epileptic Cohort (VEC) and the Randomized Cohort (RC). All measurements were plotted together and a  
615 boxplot was overlaid to compare the VEC against the RC (**Figure 3D** and **Figure 5A**). The boxplot is constructed  
616 as follows. Middle box represents the interquartile range (IQR), with a line at the median. The whiskers extend  
617 from the box to the data point lying within 1.5x the IQR. Points past the whiskers are marked as fliers.

618 We compared how significantly higher the mean for each metric of VEC was to the mean for each corre-  
619 sponding metric of RC using permutation testing ((**Nichols and Holmes, 2002**)) ( $H_0$  : mean(VEC)  $\leq$  mean(RC),  $H_1$   
620 : mean(VEC)  $>$  mean(RC)). For all measurements,  $p < 0.001$  therefore it is very unlikely that VEC performs better  
621 than RC by chance.

622 The complete set of all measurements that were performed can be found in the supplementary ??.

#### 623 4.12.1 Computing the 2D pearson correlation

624 We compare the two binarized images using Pearson correlation and overlap.

$$r = \frac{\sum (x_i - \bar{x})(y_i - \bar{y})}{\sqrt{\sum (x_i - \bar{x})^2 \sum (y_i - \bar{y})^2}} \quad (7)$$

625 Where  $x_i$  is the binary value of a pixel in the empirical case,  $y_i$  is the binary value of a pixel in the simulated case.

626 Note:  $r \in [-1, 1]$ .

#### 627 4.12.2 Binary overlap

$$Binary_{overlap} = \frac{|E_{bin} \cap S_{bin}|}{|E_{bin}|} \quad (8)$$

628 The ratio between the amount of identical timepoints divided by the entire amount of timepoints.

#### 629 4.12.3 Jaccard similarity coefficient

630 We compare the seizure onset (SO) and seizure propagation (SP) groups using Jaccard similarity coefficient.

$$SO_{Jaccard} = \frac{|E_{SO} \cap S_{SO}|}{|E_{SO} \cup S_{SO}|} \quad SP_{Jaccard} = \frac{|E_{SP} \cap S_{SP}|}{|E_{SP} \cup S_{SP}|} \quad (9)$$

631 where  $E_{SO}$ ,  $E_{SP}$  are the empirical seizure onset and seizure propagation channels, respectively.  $S_{SO}$ ,  $S_{SP}$   
632 are the simulated seizure onset and seizure propagation channels, respectively.

#### 633 4.12.4 Signal power

634 For each SEEG bipolar sensor, the signal power is computed for both the empirical and the synthetic time series  
635 and plotted in 3D (e.g. **Figure 2**, right panel).

$$P = \frac{1}{N} \sum_{t=0}^N s_t^2 \quad (10)$$

636 where  $s_t$  represents the electrode's signal amplitude at timepoint  $t$ ,  $N$  is the total number of time points,  $P$   
637 is the signal power for one electrode. The signal power across all electrodes is then normalized between 0 and  
638 1.

### 639 **4.13 Permutation test**

640 We performed a permutation test (*Nichols and Holmes, 2002*) for each metric ( $H_0 : \text{mean}(VEC) \leq \text{mean}(RC)$ ,  
641  $H_1 : \text{mean}(VEC) > \text{mean}(RC)$ ). This test showed the likeliness of the average metric values of the VEC cohort  
642 being higher than the RC cohort being attributed to chance.

## 643 **5 Data availability**

644 The virtual epilepsy patient cohort has been uploaded to the European Brain Research Infrastructure (*EBRAINS*,  
645 *2019*). The dataset card can be found using the link: <https://search.kg.ebrains.eu/live/c1702a5b-bc8f-486e-a0ee-4758a707ff00>.

## 646 **6 Acknowledgments**

647 We express our sincere appreciation to Samuel Medina Villalon and Dr. Romain Carron for their assistance with  
648 the empirical retrospective dataset.

## 649 **7 Funding**

650 The preparation of this article was funded through EU's Horizon Europe Programme SGA No. 101147319  
651 (EBRAINS 2.0), SGA No. 101137289 (Virtual Brain Twin), Amidex Recherche Blanc, No. AMX-22-RE-AB-135(HR-  
652 VEP).

## 653 **References**

- 654 **Alonso F**, Mercadal B, Salvador R, Ruffini G, Bartolomei F, Wendling F, Modolo J. Biophysical modeling of the electric field mag-  
655 nitude and distribution induced by electrical stimulation with intracerebral electrodes. *Biomedical Physics & Engineering*  
656 *Express*. 2023; 9(4):045022.
- 657 **Azilanon M**, Makhalova J, Zaaraoui W, Medina Villalon S, Viout P, Roussel T, El Mendili MM, Ridley B, Ranjeva JP, Bartolomei F,  
658 et al. Combining sodium MRI, proton MR spectroscopic imaging, and intracerebral EEG in epilepsy. *Human Brain Mapping*.  
659 2023; 44(2):825–840.
- 660 **Bandyopadhyay A**, Rabuffo G, Calabrese C, Gudibanda K, Depannemaecker D, Ivanov A, Bernard C, Jirsa VK, Petkoski S.  
661 Mean-field approximation of network of biophysical neurons driven by conductance-based ion exchange. *bioRxiv*. 2021;  
662 p. 2021–10.
- 663 **Bartolomei F**, Chauvel P, Wendling F. Epileptogenicity of brain structures in human temporal lobe epilepsy: a quantified  
664 study from intracerebral EEG. *Brain*. 2008; 131(7):1818–1830.
- 665 **Bartolomei F**, Trébuchon A, Bonini F, Lambert I, Gavaret M, Woodman M, Giusiano B, Wendling F, Bénar C. What is the  
666 concordance between the seizure onset zone and the irritative zone? A SEEG quantified study. *Clinical Neurophysiology*.  
667 2016; 127(2):1157–1162.
- 668 **Bourien J**, Bartolomei F, Bellanger J, Gavaret M, Chauvel P, Wendling F. A method to identify reproducible subsets of co-  
669 activated structures during interictal spikes. Application to intracerebral EEG in temporal lobe epilepsy. *Clinical Neuro-*  
670 *physiology*. 2005; 116(2):443–455.
- 671 **Buzsáki G**, Anastassiou C, Koch C. The origin of extracellular fields and currents—EEG, ECoG, LFP and spikes. *Nat Rev Neurosci*.  
672 2012; .
- 673 **Chang WC**, Kudlacek J, Hlinka J, Chvojka J, Hadrava M, Kumpost V, Powell AD, Janca R, Maturana MI, Karoly PJ, et al. Loss of  
674 neuronal network resilience precedes seizures and determines the ictogenic nature of interictal synaptic perturbations.  
675 *Nature neuroscience*. 2018; 21(12):1742–1752.
- 676 EBRAINS Infrastructure - Find neuroscience data, models and tools; 2019. Accessed: 2024-03-05. [https://www.ebrains.eu/  
677 data/find-data/](https://www.ebrains.eu/data/find-data/).
- 678 **El Houssaini K**, Bernard C, Jirsa VK. The epileptor model: a systematic mathematical analysis linked to the dynamics of  
679 seizures, refractory status epilepticus, and depolarization block. *Eneuro*. 2020; 7(2).

- 680 **Fröhlich F**, Bazhenov M, Iragui-Madoz V, Sejnowski TJ. Potassium dynamics in the epileptic cortex: new insights on an old  
681 topic. *The Neuroscientist*. 2008; 14(5):422–433.
- 682 Regulation (EU) 2016/679 of the European Parliament and of the Council (General Data Protection Regulation); 2016. Ac-  
683 cessed: 2024-01-30. <http://data.europa.eu/eli/reg/2016/679/2016-05-04>.
- 684 **Giuffrè M**, Shung DL. Harnessing the power of synthetic data in healthcare: innovation, application, and privacy. *NPJ Digital*  
685 *Medicine*. 2023; 6(1):186.
- 686 **Gnatkovsky V**, De Curtis M, Pastori C, Cardinale F, Lo Russo G, Mai R, Nobili L, Sartori I, Tassi L, Francione S. Biomarkers of  
687 epileptogenic zone defined by quantified stereo-EEG analysis. *Epilepsia*. 2014; 55(2):296–305.
- 688 **Gonzales A**, Guruswamy G, Smith SR. Synthetic data in health care: a narrative review. *PLOS Digital Health*. 2023;  
689 2(1):e0000082.
- 690 **Hashemi M**, Vattikonda AN, Sip V, Guye M, Bartolomei F, Woodman MM, Jirsa VK. The Bayesian Virtual Epileptic Patient: A  
691 probabilistic framework designed to infer the spatial map of epileptogenicity in a personalized large-scale brain model of  
692 epilepsy spread. *NeuroImage*. 2020; .
- 693 Summary of the HIPAA privacy rule; 1996. Accessed: 2024-01-30. [https://www.hhs.gov/hipaa/for-professionals/privacy/  
694 laws-regulations/index.html](https://www.hhs.gov/hipaa/for-professionals/privacy/laws-regulations/index.html).
- 695 **Holdgraf C**, Appelhoff S, Bickel Sea. EEG-BIDS, extending the Brain Imaging Data Structure specification to human intracranial  
696 electrophysiology. *Sci Data*. 2019; 6. doi: 10.1038/s41597-019-0105-7.
- 697 **Isnard J**, Taussig D, Bartolomei F, Bourdillon P, Catenoix H, Chassoux F, Chipaux M, Clémenceau S, Colnat-Coulbois S, Denuelle  
698 M, et al. French guidelines on stereoelectroencephalography (SEEG). *Neurophysiologie Clinique*. 2018; 48(1):5–13.
- 699 **Jirsa V**. Neural field dynamics with local and global connectivity and time delay. *Philosophical Transactions of the Royal*  
700 *Society A: Mathematical, Physical and Engineering Sciences*. 2009; .
- 701 **Jirsa V**, Stacey W, Quilichini P, Ivanov A, Bernard C. On the nature of seizure dynamics. *Brain*. 2014; 137. doi:  
702 10.1093/brain/awu133.
- 703 **Jirsa V**, Wang H, Triebkorn P, Hashemi M, Jha J, Gonzalez-Martinez J, Guye M, Makhalova J, Bartolomei F. Personalised virtual  
704 brain models in epilepsy. *The Lancet Neurology*. 2023; .
- 705 **Jiruska P**, Csicsvari J, Powell AD, Fox JE, Chang WC, Vreugdenhil M, Li X, Palus M, Bujan AF, Dearden RW, et al. High-frequency  
706 network activity, global increase in neuronal activity, and synchrony expansion precede epileptic seizures in vitro. *Journal*  
707 *of Neuroscience*. 2010; 30(16):5690–5701.
- 708 **Kane N**, Acharya J, Beniczky S, Caboclo L, Finnigan S, Kaplan PW, Shibasaki H, Pressler R, van Putten MJ. A revised glossary of  
709 terms most commonly used by clinical electroencephalographers and updated proposal for the report format of the EEG  
710 findings. Revision 2017. *Clinical neurophysiology practice*. 2017; 2:170.
- 711 **Kovac S**, Kahane P, Diehl B. Seizures induced by direct electrical cortical stimulation—Mechanisms and clinical considerations.  
712 *Clinical Neurophysiology*. 2016; 127(1):31–39.
- 713 **Kuncel AM**, Grill WM. Selection of stimulus parameters for deep brain stimulation. *Clinical neurophysiology*. 2004;  
714 115(11):2431–2441.
- 715 **Kural MA**, Duez L, Sejer Hansen V, Larsson PG, Rampp S, Schulz R, Tankisi H, Wennberg R, Bibby BM, Scherg M, et al. Criteria  
716 for defining interictal epileptiform discharges in EEG: A clinical validation study. *Neurology*. 2020; 94(20):e2139–e2147.
- 717 **La Fougère C**, Rominger A, Förster S, Geisler J, Bartenstein P. PET and SPECT in epilepsy: a critical review. *Epilepsy & Behavior*.  
718 2009; 15(1):50–55.
- 719 **Lillis KP**, Kramer MA, Mertz J, Staley KJ, White JA. Pyramidal cells accumulate chloride at seizure onset. *Neurobiology of*  
720 *disease*. 2012; 47(3):358–366.
- 721 **Makhalova J**, Medina Villalon S, Wang H, Giusiano B, Woodman M, Bénar C, Guye M, Jirsa V, Bartolomei F. Virtual epileptic  
722 patient brain modeling: Relationships with seizure onset and surgical outcome. *Epilepsia*. 2022; .
- 723 **Nichols TE**, Holmes AP. Nonparametric permutation tests for functional neuroimaging: a primer with examples. *Human*  
724 *brain mapping*. 2002; 15(1):1–25.
- 725 **Pizzo F**, Roehri N, Medina Villalon S, Trébuchon A, Carron R, Gavaret M, Giusiano B, McGonigal A, et al. Deep brain activities  
726 can be detected with magnetoencephalography. *Nature communications*. 2019; 10(1):971.



- 727 **Proix T**, Jirsa V, Bartolomei F, Guye M, Truccolo W. Predicting the spatiotemporal diversity of seizure propagation and termi-  
728 nation in human focal epilepsy. *Nature Communications*. 2018; .
- 729 **Proix T**, Bartolomei F, Guye M, Jirsa VK. Individual brain structure and modelling predict seizure propagation. *Brain*. 2017;  
730 140(3):641–654.
- 731 **Quiroga RQ**, Nadasdy Z, Ben-Shaul Y. Unsupervised spike detection and sorting with wavelets and superparamagnetic  
732 clustering. *Neural computation*. 2004; 16(8):1661–1687.
- 733 **Raimondo JV**, Burman RJ, Katz AA, Akerman CJ. Ion dynamics during seizures. *Frontiers in cellular neuroscience*. 2015; 9:419.
- 734 **Rich S**, Chameh HM, Lefebvre J, Valiante TA. Loss of neuronal heterogeneity in epileptogenic human tissue impairs network  
735 resilience to sudden changes in synchrony. *Cell Reports*. 2022; 39(8).
- 736 **Runfola C**, Sheheitli H, Bartolomei F, Wang H, Jirsa V. In pursuit of the epileptogenic zone in focal epilepsy: a dynamical  
737 network biomarker approach. *Communications in Nonlinear Science and Numerical Simulation*. 2023; 117:106973. <https://www.sciencedirect.com/science/article/pii/S1007570422004609>, doi: <https://doi.org/10.1016/j.cnsns.2022.106973>.
- 738 <https://www.sciencedirect.com/science/article/pii/S1007570422004609>, doi: <https://doi.org/10.1016/j.cnsns.2022.106973>.
- 739 **Ryvlin P**, Cross JH, Rheims S. Epilepsy surgery in children and adults. *The Lancet Neurology*. 2014; 13(11):1114–1126.
- 740 **Saggio ML**, Crisp D, Scott JM, Karoly P, Kuhlmann L, Nakatani M, Murai T, Dümpelmann M, Schulze-Bonhage A, Ikeda A, et al.  
741 A taxonomy of seizure dynamotypes. *Elife*. 2020; 9:e55632.
- 742 **Thijs RD**, Surges R, O'Brien TJ, Sander JW. Epilepsy in adults. *The Lancet*. 2019; 393(10172):689–701.
- 743 **Trebuchon A**, Racila R, Cardinale F, Lagarde S, McGonigal A, Russo GL, Scavarda D, Carron R, Mai R, Chauvel P, et al. Electrical  
744 stimulation for seizure induction during SEEG exploration: a useful predictor of postoperative seizure recurrence? *Journal*  
745 *of Neurology, Neurosurgery & Psychiatry*. 2020; .
- 746 **The Virtual Brain: The Documentation Website**; 2024. Accessed: 2024-02-01. [https://docs.thevirtualbrain.org/manuals/](https://docs.thevirtualbrain.org/manuals/UserGuide/UserGuide-UI.html)  
747 [UserGuide/UserGuide-UI.html](https://docs.thevirtualbrain.org/manuals/UserGuide/UserGuide-UI.html).
- 748 **Villalon SM**, Paz R, Roehri N, Lagarde S, Pizzo F, Colombet B, Bartolomei F, Carron R, Bénar CG. EpiTools, A software suite  
749 for presurgical brain mapping in epilepsy: Intracerebral EEG. *Journal of neuroscience methods*. 2018; 303:7–15.
- 750 **Wang HE**, Scholly J, Triebkorn P, Sip V, Villalon SM, Woodman MM, Troter AL, Guye M, Bartolomei F, Jirsa V. VEP atlas: An  
751 anatomic and functional human brain atlas dedicated to epilepsy patients. *Journal of Neuroscience Methods*. 2021 1;  
752 348:108983. <https://linkinghub.elsevier.com/retrieve/pii/S0165027020304064>, doi: [10.1016/j.jneumeth.2020.108983](https://doi.org/10.1016/j.jneumeth.2020.108983).
- 753 **Wang HE**, Woodman M, Triebkorn P, Lemarechal JD, Jha J, Dollomaja B, Vattikonda AN, Sip V, Villalon SM, Hashemi M, Guye M,  
754 Makhalova J, Bartolomei F, Jirsa V. Delineating epileptogenic networks using brain imaging data and personalized modeling  
755 in drug-resistant epilepsy. *Science Translational Medicine*. 2023 1; 15. doi: [10.1126/scitranslmed.abp8982](https://doi.org/10.1126/scitranslmed.abp8982).
- 756 **Wenzel M**, Hamm JP, Peterka DS, Yuste R. Acute focal seizures start as local synchronizations of neuronal ensembles. *Journal*  
757 *of Neuroscience*. 2019; 39(43):8562–8575.
